# Supplementary material
Source: MDPI journal article supplement (https://www.mdpi.com/2073-4395/12/3/554)
Supplement: s1 [file s1 › Supplementary table S1-S5 .xlsx]

## Sheet: Table S1
Table S1. Response of 95 radish breeding lines to P. brassicae race 4 in a greenhouse
Code	Inbred Name	Origination	Source (countries)	Skin color	Flesh color	Root shape	Disese Index (DI)
							2018 autumn	2019 spring	2019 autumn	2020 autumn	Average
CR-1	2016-P8	Dahongpao	China	Red	White	Round	1.7	-	2.6	-	2.15
CR-2	2010-P3	Banye Hongpao	China	Red	White	Round	1.3	-	2.3	-	1.8
CR-3	2016-P4	Jinzhou Wujinhong	China	Red	White	Round	2.6	-	2.8	-	2.7
CR-4	2014-P7	Jinghong No.5	China	Red	White	Round	2.3	-	2.5	-	2.4
CR-5	2016-P6	Jinghong No.6	China	Red	White	Round	2.6	-	2.8	-	2.7
CR-6	2017-P8	Shenyang Hongpao	China	Red	White	Round	-	3	2.9	-	2.95
CR-7	2016-P1	Dongsheng Banyexinlimei	China	Green	Red	Oval	2.3	2.7	-	-	2.5
CR-8	2016-P2	Dongsheng Huayexinlimei	China	Green	Red	Oval	2.6	2.7	-	-	2.65
CR-9	2016-P3	Beijing Xinlimei	China	Green	Red	Round	2.4	-	2.6	-	2.5
CR-10	2019-P1	Chunlihong	China	Green	Red	Oval	-	-	2.7	2.6	2.65
CR-11	2019-P4	Mantanghong	China	Green	Red	Oval	-	-	3.9	3.7	3.8
CR-12	2019-P5	Banye Xinlimei	China	Green	Red	Round	-	-	3.8	3.8	3.8
CR-13	2019-P7	Huaye Xinlimei	China	Green	Red	Round	-	-	3.2	3.1	3.15
CR-14	2019-P10	Zimeiren	China	Green	Red	Short cylindrical	-	-	3.4	3.6	3.5
CR-15	FW16-1-2	Qingyun	China	Green-white	White	Long cylindrical	2.9	-	3	-	2.95
CR-16	2016-P19	Lvfushi	China	Green-white	White	Long cylindrical	3.5	-	3.6	-	3.55
CR-17	2018-P14	Lvluobo	China	Green	Light-green	Short cylindrical	-	3.6	4	-	3.8
CR-18	2020-P33	Shengshi1	South Korea	Green-white	White	Short cylindrical	-	-	3.5	3.9	3.7
CR-19	QZ16-12	Henan 791	China	Green	Light-green	Oblong	-	2.9	2.5	-	2.7
CR-20	Q17-259	Shandongqing	China	Green	Green	Long cylindrical	-	3.2	3.5	-	3.35
CR-21	Q17-260	Shawoqing	China	Green	Green	Short cylindrical	-	2.8	2.8	-	2.8
CR-22	Q18-485	Tianjinqingluobo	China	Green	Green	Conical	-	1.7	1.9	-	1.8
CR-23	Q18-483	Weiqing	China	Green	Green	Short cylindrical	-	3.6	3.8	3.6	3.66667
CR-24	2016-P15	Hanbaiyu-1	South Korea	White	White	Long cylindrical	1.2	2.4	-	-	1.8
CR-25	2016-P10	Baiyuchun-1	South Korea	White	White	Long cylindrical	2	1.5	-	-	1.75
CR-26	FW18-177	Changbailong	South Korea	White	White	Long cylindrical	-	0.8	0.8	2.1	1.23333
CR-27	JY19-9	Yubai1	South Korea	White	White	Long cylindrical	-	-	2.6	3.3	2.95
CR-28	2018-P51	Yubai2	South Korea	White	White	Long cylindrical	-	1.8	2.2	-	2
CR-29	FW19-82	SW19-6	South Korea	White	White	Long cylindrical	-	-	0	0	0
CR-30	FW16-2-5	Hanbaiyu2	South Korea	White	White	Spindle	2.8	2.7	-	-	2.75
CR-31	SW218	Baiyuchun2	South Korea	White	White	Long cylindrical	1.6	1.5	1.9	1.5	1.625
CR-32	FW18-71	Xiaoyuanbai	South Korea	White	White	Round	-	2.2	2.5	-	2.35
CR-33	FW18-174-5	301	South Korea	White	White	Oblong	-	3.5	3.5	-	3.5
CR-34	2018-P49	Yubai4	South Korea	White	White	Spindle	-	1.9	1.8	-	1.85
CR-35	2016-301A	Yangzhou Yuanbai	China	White	White	Oblong	3.6	3.6	-	-	3.6
CR-36	FW18-73	Yuanbai No.1	China	White	White	Spindle	3.6	3.5	3.7	-	3.6
CR-37	FW18-97	Yuanbai No.2	China	White	White	Oval	3.3	3.2	-	-	3.25
CR-38	FW19-185	Yuanbai No.3	China	White	White	Spindle	-	-	0.3	0.6	0.45
CR-39	FW19-176	Yuanbai No.4	China	White	White	Spindle	-	-	2.1	3.5	2.8
CR-40	FW19-336	Yuanbai No.5	China	White	White	Spindle	-	-	2.8	2.9	2.85
CR-41	FW18-148-3	Xiabaixue	China	White	White	Long cylindrical	-	3.2	2.9	-	3.05
CR-42	2016-P23	Zhe Dachang	China	White	White	Long cylindrical	0	0	0	0	0
CR-43	2016-P25	Xiangyabai	China	White	White	Long cylindrical	1.6	1.9	-	-	1.75
CR-44	2018-P42	Xiakang No.40	China	White	White	Long cylindrical	-	2.2	2.3	-	2.25
CR-45	FW20-1	Maer Luobo	China	White	White	Long cylindrical	-	-	3.5	3.4	3.45
CR-46	FW20-2	Bailuobo	China	White	White	Long cylindrical	-	-	0	0	0
CR-47	FW20-5	Yinyubailuobo	China	White	White	Long cylindrical	-	-	0	0	0
CR-48	FW20-6	Baiyuxue	China	White	White	Long cylindrical	-	-	0	0	0
CR-49	FW20-7	Qiubai No.65	China	White	White	Long cylindrical	-	-	0	0	0
CR-50	FW20-8	Xiaqiubai	China	White	White	Long cylindrical	-	-	3.8	3.6	3.7
CR-51	FW20-9	Qiuyu60	China	White	White	Long cylindrical	-	-	0	0	0
CR-52	FW20-10	Baisha Nanpanzhou	China	White	White	Long cylindrical	-	-	2.9	3.3	3.1
CR-53	2016-P14	KDM4	South Korea	Green-white	White	Short cylindrical	0	0	0	0	0
CR-54	FW16-19-1	Zhaofu	South Korea	Green-white	White	Short cylindrical	0	0	0	0	0
CR-55	FW16-23-2	Qingbaoxia	South Korea	Green-white	White	Short cylindrical	0.2	1.2	1.3	0.9	0.9
CR-56	2016-P22	FW16-1	South Korea	Green-white	White	Long cylindrical	2.2	2.3	-	-	2.25
CR-57	2017-P10	FW15-26	South Korea	Green-white	White	Short cylindrical	-		0	0	0
CR-58	2016-P24	FW19-114	South Korea	Green-white	White	Short cylindrical	0	0	0	0	0
CR-59	FWA1-3	YR-tengu	Japan	Green-white	White	Long cylindrical	0	0	0	0	0
CR-60	FWA3-1	YR-kurama	Japan	Green-white	White	Long cylindrical	0	0	0	0	0
CR-61	2018-P24	Sento	Japan	Green-white	White	Long cylindrical	0	0	0	0	0
CR-62	2018-P30	Oroshi	Japan	Green-white	White	Long cylindrical	-	0	0	0	0
CR-63	FWA10-6	Taibyon-Sohbutori	Japan	Green-white	White	Long cylindrical	0.2	0.1	0	0.2	0.125
CR-64	FW16-20-7	Akichumali	Japan	White	White	Long cylindrical	0	0	0	0	0
CR-65	2018-P34	Miyashige-Sobuto	Japan	Green-white	White	Long cylindrical	-	1.5	0.3	2.2	1.33333
CR-66	2018-P36	Miyashige Onaga	Japan	Green-white	White	Long cylindrical	-	0	0	0	0
CR-67	2018-P21	Zhaofu	South Korea	Green-white	White	Long cylindrical	-	0	0	0	0
CR-68	2013-P4	Ninengo Daikon	South Korea	Green-white	White	Long cylindrical	-	3.1	3.3	-	3.2
CR-69	SWA2	Fujikaze	Japan	Green-white	White	Long cylindrical	-		1.2	1.5	1.35
CR-70	SWA5	Chiyakaze	Japan	Green-white	White	Long cylindrical	-		0.9	1.4	1.15
CR-71	SWA7	Shigachiwase	Japan	Green-white	White	Long cylindrical	-		1.1	1.5	1.3
CR-72	2017-P33	SW18-14	South Korea	Green-white	White	Long cylindrical	-	1.5	1.6	-	1.55
CR-73	2016-P20	SW18-15	South Korea	Green-white	White	Long cylindrical	-	2.1	-	3.6	2.85
CR-74	2016-P13	KDM1	South Korea	Green-white	White	Long cylindrical	1.2	0.9	1.5	1.2	1.2
CR-75	FW16-14-5	KDM2	South Korea	Green-white	White	Short cylindrical	0	0	0	0	0
CR-76	2016-P17	KDM8	South Korea	Green-white	White	Short cylindrical	0	0	0	0	0
CR-77	FW16-15-2	KDM10	South Korea	Green-white	White	Short cylindrical	0.5	0.6	1.2	0.5	0.7
CR-78	2016-P16	KDM7	South Korea	White	White	Long cylindrical	0	0	0	0	0
CR-79	FW16-16-10	KDM11	South Korea	White	White	Long cylindrical	0	0	0	0	0
CR-80	FW16-17-9	KDM12	South Korea	White	White	Long cylindrical	0.9	1.1	0.5	0.4	0.725
CR-81	2016-301C	301C	South Korea	White	White	Long cylindrical	1.3	0.2	0.5	2.3	1.075
CR-82	2018-P40	Atarayashima	Japan	White	White	Long cylindrical	-	0	2.1	1.2	1.1
CR-83	2018-P43	Natsuminowase No.3	Japan	White	White	Long cylindrical	-	0	0	0	0
CR-84	FW18-47	Baijiangjun	South Korea	White	White	Long cylindrical	-	0	0	0	0
CR-85	C20-143-1	Baihe	South Korea	White	White	Long cylindrical	-	-	3.4	3.8	3.6
CR-86	2020-P35	Baitianxia	South Korea	White	White	Long cylindrical	-	-	3.1	3.7	3.4
CR-87	FWA9-3	Kanbaku	Japan	White	White	Long cylindrical	0	0	0	0	0
CR-88	FWA11-8	Shirokubi-Miyashige	Japan	White	White	Long cylindrical	0	0	0	0	0
CR-89	FW16-22-1	Niizeki	Japan	White	White	Long cylindrical	0	0	0	0	0
CR-90	SA14-1	Hongyingtao	the Unitated States	Red	White	Small-round	1.5	1.6	-	-	1.55
CR-91	2015-P13	Hongyu	Holand	Red	White	Small-round	1.6	1.6	-	-	1.6
CR-92	S16-5	Hongputao	Frech	Red	White	Small-round	1.2	1.5	-	-	1.35
CR-93	S16-18	Champion	the Unitated States	Red	White	Small-round	1.3	1.3	-	-	1.3
CR-94	S16-65	Cherry Bell	the Unitated States	Red	White	Small-round	0.2	0.5	-	-	0.35
CR-95	S16-69	Hongding	the Unitated States	Red	White	Small-round	1.6	1.9	-	-	1.75
Note: "-"means no data.

## Sheet: Table S2
Table S2. Primers used in this study
Gene ID	Primers or markers name	Gene/QTL regionsa	Primer sequence (5' to 3')	Primer sequence (5' to 3')	Fragment sizec
Rsa10003637 (RsCrr1)	Crr1-8F/8R	-984～155bp	AACTTCTATAACCGAAAACG	CAAATCCCTATCATCCTCAC	1145bp
	Crr1-2F/2R	6～1768bp	TGAGGAAATAGCCACTGATGTT	CCATTGAGGTCCAGATTCATGAG	1757bp
	Crr1-3F/3R	1545～2252bp	TCTCATGAATCTGGACCTCAATG	TCCAGTGTCGGTCAAGTGAA	508bp
	Crr1-4F/4R	2436～3811bp	CTTGGGTGGTTGTCTCTCAA	GCTGAGGTTTCCAAAGGACG	1376bp
Rsa10025569 (RsCRa)	Cra-10F/10R	-1012～228bp	TTCATTTGCCATTCTCGCTG	TGAAGGAGACAGAGCAGACA	1100bp
	Cra-1F/1R	174～877bp	GTCTCCGCTACTACCACCTC	TGTCTGTCACATTCTTGGAACA	671bp
	Cra-6F/6R	714～1657bp	GTTTGTCCCCTATGCTTTGT	ATTTCAAGAGCCTCGTCGTC	924bp
	Cra-7F/7R	1544～2568bp	TGGTCCTGGAAGTCGGATAA	AGGTAGTTGCTTTCAGTCAAGA	994bp
	Cra-8F/8R	2435～3556bp	ATGCCATATCCCGTGACATG	GACGAGGCCATGACATGATT	1119bp
	Cra-9F/9R	3534～4330bp	AATCATGTCATGGCCTCGTC	ATGCCGGCTCATTTGTACTC	756bp
Rsa10025571 (RsCRa)	Cra-11F/11R	-1354～90bp	GGTTGAAGCCGAGGATGAAG	GCTTCCATCCCAACAAAACC	1442bp
	Cra-2F/2R	70～1069bp	GGTTTTGTTGGGATGGAAGCT	GGCATATATCTCCAGCATCAACC	1000bp
	Cra-3F/3R	1047～2175bp	GGTTGATGCTGGAGATATATGCC	GCATCCACTCAAATCAATTTCGT	1064bp
	Cra-4F/4R	2153～3411bp	ACGAAATTGATTTGAGTGGATGC	TCACAGCTTCCATTGACATGAG	1237bp
Crr3 QTL markersb	BrSTS-30-F/R	BrSTS-30	CTCAAGGTTCCCCACCCTATAACT	CCTTGTAAGAATCGCATTCAAGAT	300bp
	BrSTS-33-F/R	BrSTS-33	AGGCTCTTCTAAATCAAAGCAAGA	ATTCCCTTGAAGTGATCTTTTTGA	685bp
	BrSTS-61-F/R	BrSTS-61	CCATCCGCAGGAGTTAAAGTTGTA	AGAAAACGGCTGAGGGTTACTAC	222bp
a The amplified region of the gene marker, starting from the start codon ATG.
b QTL marker reference Kamei et al., 2010 and Saito et al., 2006.
c Fragment size is estimated based on radish reference genome "XYB36-2".

## Sheet: Table S3
Table S3. Clubroot resistance to P. brassicae race 4 and the genotype of Crr1, Crr3, and CRa
Code	Inbred Name	Disese index (DI)	Resistance level	Rsa10003637 (Crr1) Genotype				Crr3 QTLGenotype				Rsa10025569 (CRa) Genotype
				Crr1-6F/6Ra	Crr1-7F/7R	Crr1-8F/8Rb	Haplotypec	BrSTS-30	BrSTS-33	BrSTS-61	Haplotype	CRa-7F/7R	CRa-8F/8R	CRa-9F/9R	Haplotype
CR-79	FW16-16-10	0	Immune	910	1000	1100	H1	500	H1	200	H1	900	1200	1500	H1
CR-59	FWA1-3	0	Immune	900	990	1100	H2	500	H2	200	H2	900	1100	1500	H2
CR-60	FWA3-1	0	Immune	900	990	-	H3	500	H2	200	H2	900	1200	750	H3
CR-88	FWA11-8	0	Immune	900	990	1100	H2	500	H2	200	H2	900	1200	750	H3
CR-75	FW16-14-5	0	Immune	900	990	1100	H2	500	H1	200	H1	900	1100	1500	H2
CR-78	2016-P16	0	Immune	910	1000	-	H4	500	H1	200	H1	900	1200	750	H3
CR-3	2016-P4	2.7	Moderately susceptible	900	990	1100	H2	500	H2	200	H2	900	1100	750	H4
CR-6	2017-P8	2.95	Moderately susceptible	900	990	1100	H2	500	H3	200	H3	900	1100	1500	H2
CR-35	2016-301A	3.6	Highly susceptible	900	990	1100	H2	500	H2	200	H2	900	1100	1500	H2
CR-34	2018-P49	1.85	Slightly susceptible	910	1000	-	H4	500	H1	200	H1	500	1200	750	H5
CR-28	2018-P51	2	Moderately susceptible	900	990	-	H3	500	H1	200	H1	900	1100	750	H4
CR-10	2019-P1	2.65	Moderately susceptible	900	990	1100	H2	500	H2	200	H2	900	1100	1500	H2
CR-12	2019-P5	3.8	Highly susceptible	900	990	-	H3	500	H2	200	H2	900	1100	1500	H2
CR-19	QZ16-12	2.7	Moderately susceptible	900	990	-	H3	500	H2	200	H2	900	1100	750	H4
CR-20	Q17-259	3.35	Highly susceptible	900	990	1100	H2	500	H2	200	H2	900	1100	1500	H2
CR-23	Q18-483	3.67	Highly susceptible	900	990	-	H3	500	H2	200	H2	900	1100	1500	H2
a The number indicates the approximate amplified fragment size as the genotype of the marker (Figure 2).
b "-" means that no amplified product is detected.
c Haplotypes are determined according to the combination of different genotype markers.

## Sheet: Table S4
Table S4. Alignment of CRa, Rsa10025569 sequences in the CR-60, CR-10, and XYB36-2 reference genome. The CRa cabbage sequences were down loaded from GenBank (accession no. AB751516). Red arrows and blue box indicate primers location and four exons, respectively. Red triangle and green box indicated location and sequences of 699bp insertion fragment. Red box indicated position of termination codon…
Rsa10025569-CR-10 TTCATTTGCCATTCTCGCTGCTCCTGCATATGCTTCTTCATATTGTTTTTGAAAATTCAG 60
RSa10025569-XYB TTCATTTGCCATTCTCGCTGCTCCTGCATATGCTTCTTCATATTGTTTTTGAAAATTCAG 60
Rsa10025569-CR-60 ------------------------------------------------------------
CRa-Chinese TAAATCCTTAATTTTCAATTGATGTGCATTTTTTTCTGTATTAATTAGTGTAAGATTATC 60
Rsa10025569-CR-10 ATTCCATCAAGAAAACCAAGAAATCAGTTTTCCTTTTTTTTTTCTACCTATTTCTTCAAC 120
RSa10025569-XYB ATTCCATCAAGAAAACCAAGAAATCAGTTTTCCTTTTTTTTTTCTACCTATTTCTTCAAC 120
Rsa10025569-CR-60 ------------------------------------------------------------
CRa-Chinese ATTGTGTGATATTGAGTTTGAACAAAAATGTG------TAGCCAAATATATGTTTATAAG 114
Rsa10025569-CR-10 TCCACTGTTTTGTGATATACTGATAAGCTATTGGGTCTATATCTTGGGCTTCAAATAAAT 180
RSa10025569-XYB TCCACTGTTTTGTGATATACTGATAAGCTATTGGGTCTATATCTTGGGCTTCAAATAAAT 180
Rsa10025569-CR-60 ------------------------------------------------------------
CRa-Chinese AGTA----TGTGCATCATATAAATTATTCATTCCTTCTATACCTTGAATATCAAGCAAAC 170
Rsa10025569-CR-10 TA--GTTAATG-----GGCTCTGTAGCTTTGTGTTTACGTTCATTTAGAACTCTATTTAG 233
RSa10025569-XYB TA--GTTAATG-----GGCTCTGTAGCTTTGTGTTTACGTTCATTTAGAACTCTATTTAG 233
Rsa10025569-CR-60 ------------------------------------------------------------
CRa-Chinese AATTGTTAACAAAACAGAAACAAAATAAAAATGTCTGCAATCTGTCCCAAATCAGTTAAA 230
Rsa10025569-CR-10 CCAAGTCTGGTCTGTAGACAGAACCGGGCTTTACCCATGCTTGCGAAACATTTAAATGGG 293
RSa10025569-XYB CCAAGTCTGGTCTGTAGACAGAACCGGGCTTTACCCATGCTTGCGAAACATTTAAATGGG 293
Rsa10025569-CR-60 ------------------------------------------------------------
CRa-Chinese TGAAGTTC--CCATTCACCATAACCTACTTTTTCTAAAGTTCTACACACGATCAAA---- 284
Rsa10025569-CR-10 GTCTCCATTTTTGCGAGGTCCCTTTTTAAAAAAAAAA-AACTTTTTGTATTTACTAAATA 352
RSa10025569-XYB GTCTCCATTTTTGCGAGGTCCCTTTTTAAAAAAAAAA-AACTTTTTGTATTTACTAAATA 352
Rsa10025569-CR-60 ------------------------------------------------------------
CRa-Chinese GTTTCCATTCAC-CATCATCTGTGCTAAAACATATAATGAGATCAGATTCTTAGGTTATA 343
Rsa10025569-CR-10 TATAAATGTTTAATGTAAAATAGTAAGAAAATGATAAAAACTAGATTTTAAAACTAATAA 412
RSa10025569-XYB TATAAATGTTTAATGTAAAATAGTAAGAAAATGATAAAAACTAGATTTTAAAACTAATAA 412
Rsa10025569-CR-60 ------------------------------------------------------------
CRa-Chinese AACTATTGTATGAT-CATAATCTTAAGAAATC--TAAAACATTTGTTTATATATTAATGA 400
Rsa10025569-CR-10 TTATATAAAACAACTTTATAATAGATTA-AAATGTTCTTTTGAAATT-TTAAGTTGCCAA 470
RSa10025569-XYB TTATATAAAACAACTTTATAATAGATTA-AAATGTTCTTTTGAAATT-TTAAGTTGCCAA 470
Rsa10025569-CR-60 ------------------------------------------------------------
CRa-Chinese TAAAGCAGAAGAAG---AAAGTTGATTGCAGATACTTTATTAAACCTACTTTCTTGTCAA 457
Rsa10025569-CR-10 AAAATATTTTATCT-TAATAAATAGTTTTAAATTCTTTTTTAAAAATATCTTTAAAAATT 529
RSa10025569-XYB AAAATATTTTATCT-TAATAAATAGTTTTAAATTCTTTTTTAAAAATATCTTTAAAAATT 529
Rsa10025569-CR-60 ------------------------------------------------------------
CRa-Chinese TAGAGTTGAAGCCCATGATGAA-ACTTCCAGAGAAGATTAATCTCTTCGCTGTAAAATTT 516
Rsa10025569-CR-10 TTAAAATTAGATTAAAAATAT-GTTTTGGACATAGCCCCGAAATCTGAGGTACGACTCTG 588
RSa10025569-XYB TTAAAATTAGATTAAAAATAT-GTTTTGGACATAGCCCCGAAATCTGAGGTACGACTCTG 588
Rsa10025569-CR-60 ------------------------------------------------------------
CRa-Chinese CAAGTGTGAACTCATTAATATTGATGTAGAGACACTGATGTCAATCACTACTTCCTTGAA 576
Rsa10025569-CR-10 TCTGCAGGAAACACTTTTCGATTACACGGTCATCAATCTCAATTTCTTCCTCTCTATCTT 648
RSa10025569-XYB TCTGCAGGAAACACTTTTCGATTACACGGTCATCAATCTCAATTTCTTCCTCTCTATCTT 648
Rsa10025569-CR-60 ------------------------------------------------------------
CRa-Chinese GTTGCTTCAGCTCTTCCTTGCCTTTTCC-TCCTTAGCATAGGATGCCCCCAACGCACTGT 635
Rsa10025569-CR-10 CTCTTCTACCTTTGCTCTTGGTCATTTCTCCTTCCCTTTCTGTTCTACAGATTTGATCCT 708
RSa10025569-XYB CTCTTCTACCTTTGCTCTTGGTCATTTCTCCTTCCCTTTCTGTTCTACAGATTTGATCCT 708
Rsa10025569-CR-60 ------------------------------------------------------------
CRa-Chinese TCCCACTACAAAGAATGGTGG--AGCCATGCATTACCTTTATCTGTGAATTTTTTTTCAC 693
Rsa10025569-CR-10 TCTAGGATCTTATCATATACTAATACTTTATTCCCCCAAGAAAAGAAAAAAGCTTTCCAA 768
RSa10025569-XYB TCTAGGATCTTATCATATACTAATACTTTATTCCCCCAAGAAAAGAAAAAAGCTTTCCAA 768
Rsa10025569-CR-60 ------------------------------------------------------------
CRa-Chinese CACAAAGTCTCTCTCAGTCAACGGAGTCAACTTTTCATGTAGCTTTGTTCAATTATACAA 753
Rsa10025569-CR-10 AAATGAGATTTCGATCGTT-TTTGAAAGAAACTAAGAAACAGAG-----AAGGGTAGTGG 822	Exon 1
RSa10025569-XYB AAATGAGATTTCGATCGTT-TTTGAAAGAAACTAAGAAACAGAG-----AAGGGTAGTGG 822
Rsa10025569-CR-60 ------------------------------------------------------------
CRa-Chinese AAAGCATCTTTGTTTCACTCTTTGCTCCACAATCAGTAGCAAGCTCATTGATCCTTTTCC 813
Rsa10025569-CR-10 AAAAGAGAAAGAAGAGGAAAGCAGATGAGCTTTCAAATCCAGTGA--GAAAGAAGATCC- 879
RSa10025569-XYB AAAAGAGAAAGAAGAGGAAAGCAGATGAGCTTTCAAATCCAGTGA--GAAAGAAGATCC- 879
Rsa10025569-CR-60 ------------------------------------------------------------
CRa-Chinese CCACCTCACAAATGGATTTCTCTCTTTTCCTTACCATCGTTGCTGCTGCAATAGGTTTCT 873
Rsa10025569-CR-10 ----GAGT-GAAAAACCAGAGTCAAACTCAAGACCAATCATCACC-TCCTTCTTCTTTGT 933
RSa10025569-XYB ----GAGT-GAAAAACCAGAGTCAAACTCAAGACCAATCATCACC-TCCTTCTTCTTTGT 933
Rsa10025569-CR-60 ------------------------------------------------------------
CRa-Chinese TCGTGATTCGAAGATTCAGATTCAATCCAGAAAACAATGAAATCGATACTTCGTCTTTGT 933
Rsa10025569-CR-10 CTCCTCCCTCATTTTTGTCTCCACCGTCACCTCAGTCTTCGTTGTCTCCGCTACTACCAC 993
RSa10025569-XYB CTCCTCCCTCATTTTTGTCTCCACCGTCACCTCAGTCTTCGTTGTCTCCGCTACTACCAC 993
Rsa10025569-CR-60 ------------------------------------------------------------
CRa-Chinese CTCCATCATCACCACCATCTTCTTTATCTTCTAGGTCTT---TGTCTAC---ATCATCAA 987
Rsa10025569-CR-10 CTCTGTCTGCTCTGTCTCCTTCATCCGCT---CCATCTTCTTCCTCTCACGTCTGGTTAC 1050
RSa10025569-XYB CTCTGTCTGCTCTGTCTCCTTCATCCGCT---CCATCTTCTTCCTCTCACGTCTGGTTAC 1050
Rsa10025569-CR-60 ------------------------------------------------------------
CRa-Chinese CTCCATCTGCTTTGTCTCCTTCATCGGCTTCTCCATCTTCTTCCTCTCATGTCTGGATGT 1047
Rsa10025569-CR-10 ACGATGTCTTTCCGAGCTTCCGCGGGGAAGATGTCCGCGATAACTTTCTTAGTCACATTA 1110
RSa10025569-XYB ACGATGTCTTTCCGAGCTTCCGCGGGGAAGATGTCCGCAATAACTTTCTTAGTCACATTA 1110
Rsa10025569-CR-60 ------------------------------------------------------------
CRa-Chinese ACGATGTCTTTCCGAGCTTCCGTGGGGAAGATGTCCGCTACAACTTTCTCAGTCACATTA 1107
Rsa10025569-CR-10 AAAAGGAGTTTGGAAGAAAGACAATCACATTTTTCAACGATAATGGGATCGAGAGAGGAG 1170
RSa10025569-XYB AAAAGGAGTTTGGAAGAAAGACAATCACATTTTTCAACGATAATGGGATCGAGAGAGGAG 1170
Rsa10025569-CR-60 ------------------------------------------------------------
CRa-Chinese AAAAGGAGTTTAAAAGGAAGACAATCACATTTTTCAACGATAATGGGATCGAGAGAGGAG 1167
Rsa10025569-CR-10 AATCCATCGCTCCCGAACTCATACGGGGGATTAGAGCATCTAAGATCGCGATCGTCTTGC 1230
RSa10025569-XYB AATCCATCGCTCCCGAACTCATACGGGGGATTAGAGCATCTAAGATCGCGATCGTCTTGC 1230
Rsa10025569-CR-60 ------------------------------------------------------------
CRa-Chinese AATCCATCGCTCCTGAACTCATACAGGGGATTAGAGGATCTAAGATTGCGATCGTCTTGC 1227
Rsa10025569-CR-10 TCTCGAGGAACTACGCTTCTTCTAAGTGGTGTCTTGAGGAGTTGGTGGAGATTATGAAGT 1290
RSa10025569-XYB TCTCGAGGAACTACGCTTCTTCTAAGTGGTGTCTTGAGGAGTTGGTGGAGATTATGAAGT 1290
Rsa10025569-CR-60 ------------------------------------------------------------
CRa-Chinese TCTCTACGAACTACGCTTCTTCAAAGTGGTGTCTTGAGGAGTTGGTGGAGATTATGAAGT 1287
Rsa10025569-CR-10 GCAGGGAGGAGCTGGGTCAAACTGTGATTGCTATTTTCTATAAAGTAGATCCATCTGATG 1350
RSa10025569-XYB GCAGGGAGGAGCTGGGTCAAACTGTGATTGCTATTTTCTATAAAGTAGATCCATCTGATG 1350
Rsa10025569-CR-60 ------------------------------------------------------------
CRa-Chinese GCAGGGAGGAGCTTGGTCAAACTGTGATTGCTATTTTCTACAAAGTAGATCCATCTGACG 1347
Rsa10025569-CR-10 TAAAGAAGCTGACCGGTGATTTTGGGGAGGTGTTCGGAGAAACTTGTAAGGGTAAAGCTA 1410
RSa10025569-XYB TAAAGAAGCTGACCGGTGATTTTGGGGAGGTGTTCGGAGAAACTTGTAAGGGTAAAGCTA 1410
Rsa10025569-CR-60 ------------------------------------------------------------
CRa-Chinese TAAAGAAGCTGACCGGAGACTTTGGGGAGGTTTTCAGAAAGACTTGTAAGGGTAAAGCTA 1407
Rsa10025569-CR-10 AGAAGGAGATTAGGAGGTGGAAACAAGCTTTGGAGAAGGTGGCCACAATAGCTGGTTACC 1470
RSa10025569-XYB AGAAGGAGATTAGGAGGTGGAAACAAGCTTTGGAGAAGGTGGCCACAATAGCTGGTTACC 1470
Rsa10025569-CR-60 ------------------------------------------------------------
CRa-Chinese AGGAGGAGATTAGGAGGTGGGAACAAGCTTTGGAGAAGGTGGCCGTAATAGCTGGTTACC 1467
Rsa10025569-CR-10 ATTCATGCAACTGGTTTGTCCCCTATGCTTTGTTTTTTTA-CTTGCAATC----TTTCAA 1525
RSa10025569-XYB ATTCATGCAACTGGTTTGTCCCCTATGCTTTGTTTTTTTA-CTTGCAATC----TTTCAA 1525
Rsa10025569-CR-60 ------------------------------------------------------------
CRa-Chinese ATTTATCCAACTGGTTTGTCCGCTTAACTTTTACTTGCTATCTTTCAAACACATCCACAA 1527
Rsa10025569-CR-10 AATATTATATGTACAGAAAAA-TACTAAAAATACCAAACAAATATTAATAAA-TTTTCA- 1582
RSa10025569-XYB AATATTATATGTACAGAAAAA-TACTAAAAATACCAAACAAATATTAATAAA-TTTTCA- 1582
Rsa10025569-CR-60 ------------------------------------------------------------
CRa-Chinese CATATGATATGTATAGAAAAAATACTCAAAATATGAAACAAAAATAAACAAAATTTTCAA 1587
Rsa10025569-CR-10 -------------------GCTTACTA-------TATATAGGCCTG--ACTATATAACAT 1614
RSa10025569-XYB -------------------GCTTACTA-------TATATAGGCCTG--ACTATATAACAT 1614
Rsa10025569-CR-60 ------------------------------------------------------------
CRa-Chinese AAATATGACAAGAGTTTAGGTTTACGAAAGAGTCCATAAAAGTTTACTACGGTCTCCTAA 1647
Rsa10025569-CR-10 GATTTGAGAAATGTTCCAAGAATGTGACAG----ACAATTTTAATATCTCGGTAGTAATT 1670
RSa10025569-XYB GATTTGAGAAATGTTCCAAGAATGTGACAG----ACAATTTTAATATCTCGGTAGTAATT 1670
Rsa10025569-CR-60 ------------------------------------------------------------
CRa-Chinese AATTTTAGAAACGTAATAAAGTTGTGGCGTTTTCAAATTTTTATGATTTCGGTTATAATT 1707
Rsa10025569-CR-10 TTGGAA------AAATGTGAATTTTTTT-TTTCTCTAATCACAAAATGTGAAAGTTCGTT 1723
RSa10025569-XYB TTGGAA------AAATGTGAATTTTTTT-TTTCTCTAATCACAAAATGTGAAAGTTCGTT 1723
Rsa10025569-CR-60 ------------------------------------------------------------
CRa-Chinese TTGGAACAGAAAAAATGTAAGTTCTTCCATTTTTCTAGTCACGTAATGTGAAAGTT--AT 1765
Rsa10025569-CR-10 AGTTTAATTATTTTTACTACAAAATTTAAAATAA-AAACTCTTA-------------AAT 1769
RSa10025569-XYB AGTTTAATTATTTTTACTACAAAATTTAAAATAA-AAACTCTTA-------------AAT 1769
Rsa10025569-CR-60 ------------------------------------------------------------
CRa-Chinese ACATGCTTAATTTTTATACCAAAATTAAAAATAGTAAACTTTTATCATCTCTGTATCAAT 1825
Rsa10025569-CR-10 TTTAT-----AATGTCTGTATCAATAATGACTATTTTATTATGTATTCTATCATCTTTCC 1824
RSa10025569-XYB TTTAT-----AATGTCTGTATCAATAATGACTATTTTATTATGTATTCTATCATCTTTCC 1824
Rsa10025569-CR-60 ------------------------------------------------------------
CRa-Chinese TTTGTCTCTGATTGTGTGTAGTAAATTTAATGACTATATAGTTGATGTTTTCTTCTCTCC 1885
Rsa10025569-CR-10 TCTTTCTAGGGTTGATGAAGCTGCCATGATCGAGGATATATGCACCGATGTTTATAACAA 1884	Exon 2
RSa10025569-XYB TCTTTCTAGGGTTGATGAAGCTGCCATGATCGAGGATATATGCACCGATGTTTATAACAA 1884
Rsa10025569-CR-60 ------------------------------------------------------------
CRa-Chinese TCTTTCTAGGGATGATGAAGCTACCGTGATCGAGAATATATCAACATGTGTTTTAAACAA 1945
Rsa10025569-CR-10 GCTGAATAATTCTGCACAATCGAGTGATTTCGACAGTCTCGTTGGGATGAGAGCTCATAT 1944
RSa10025569-XYB GCTGAATAATTCTGCACAATCGAGTGATTTCGACAGTCTCGTTGGGATGAGAGCTCATAT 1944
Rsa10025569-CR-60 ------------------------------------------------------------
CRa-Chinese GCTGGTTAATTCTCCACAACCGAGTCATTTCGACAATCTAGTTGGGATGAGTACTCATAT 2005
Rsa10025569-CR-10 GACAAAACTGGAACTGTTGTTACGCCTAGGCTCCAATGAAGTGAGGATGATAGGGATTTG 2004
RSa10025569-XYB GACAAAACTGGAACTGTTGTTACGCCTAGGCTCCAATGAAGTGAGGATGATAGGGATTTG 2004
Rsa10025569-CR-60 ------------------------------------------------------------
CRa-Chinese GGAAAATCTGGAACTGTTGTTAAGCCTGGGCTCCAAGGAAGTGAGGATGGTAGGGATTTG 2065
Rsa10025569-CR-10 GGGTCCTTCTGGAATTGGTAAGAGCACCATCGCCAGAGTTCTATTTAGCCAATACTCTCG 2064
RSa10025569-XYB GGGTCCTTCTGGAATTGGTAAGAGCACCATCGCCAGAGTTCTATTTAGCCAATACTCTCG 2064
Rsa10025569-CR-60 ------------------------------------------------------------
CRa-Chinese GGGTCCTTCTGGAATTGGTAAGAGCACCATCGCCAGAGTTCTATTCAACCAACACTCTCA 2125
Rsa10025569-CR-10 CGAGTTCCAGTTTAGTGTCTTTATGGAGAATATTAAAAGACGTTTTCCCAGACCTTACTA 2124
RSa10025569-XYB CGAGTTCCAGTTTAGTGTCTTTATGGAGAATATTAAAAGACGTTTTCCCAGACCTTACTA 2124
Rsa10025569-CR-60 ------------------------------------------------------------
CRa-Chinese TCAGTTCCAATTTAGTGTCTTTATGGAGAACATTAAAAGACTTTGGCCCAGACCTTATTA 2185
Rsa10025569-CR-10 CGATGAGTACAGTGCTAAACTGCAATTACAAAAAGAGTTCATGTCCCAAATAATCAACCG 2184
RSa10025569-XYB CGATGAGTACAGTGCTAAACTGCAATTACAAAAAGAGTTCATGTCCCAAATAATCAACCG 2184
Rsa10025569-CR-60 ------------------------------------------------------------
CRa-Chinese CGATGAGTACAGTGTGAAACTGCAACTACAAGAAGAGTTCCTGTCCCGGGTAATCAACCA 2245
Rsa10025569-CR-10 AGAAGATATGAAGATTCAGCATTTAGGAGTTGTGGAAGACAGGTTAAAAGACAAGAGAGT 2244
RSa10025569-XYB AGAAGATATGAAGATTCAGCATCTAGGAGTTGTGGAAGACAGGTTAAAAGACAAGAGAGT 2244
Rsa10025569-CR-60 ------------------------------------------------------------
CRa-Chinese AAAAGATATCAAGATTCAGCAATTAGGAGTTGTGGAAGACAGGTTAAAGGACAAGAGAGT 2305
Rsa10025569-CR-10 GCTTGCCATTCTTGATGACGTGGATCATTCGTTGCAAATAGAAGCCATAGCGAAAGAAGC 2304
RSa10025569-XYB GCTTGCCATTCTTGATGACGTGGATCATTCGTTGCAAATAGAAGCCATAGCGAAAGAAGC 2304
Rsa10025569-CR-60 ------------------------------------------------------------
CRa-Chinese GCTTGCCATTCTTGATGACGTGGATCATTTGTTGCAAATAGAAGCCATAGCTAAAGAAGC 2365
Rsa10025569-CR-10 TCGGTGGTTTGGTCCTGGAAGTCGGATAATCATCACAACACAAGATAAAAGGCTTTTAAA 2364
RSa10025569-XYB TCGGTGGTTTGGTCCTGGAAGTCGGATAATCATCACAACACAAGATAAAAGGCTTTTAAA 2364
Rsa10025569-CR-60 ---------TGGTCCTGGAAGTCGGATAATCATCACAACACAAGATAAAAGGCTTTTAAA 51
CRa-Chinese TCGGTGGTTTGGTCCTGGAAGTTGGATAATCATCACAACACAAGATAAAAGGCTTTTATA 2425
************* *********************************** *
Rsa10025569-CR-10 TGCACGTAGGATTGACGATATTTACGAGGTGGAGTTTCCACCTGACGACGAGGCTCTTGA 2424
RSa10025569-XYB TGCACGTAGGATTGATGATATTTACGAGGTGGAGTTTCCACCTGACGACGAGGCTCTTGA 2424
Rsa10025569-CR-60 TGCACGTAGGATTGACGATATTTACGAGGTGGAGTTTCCACCTGACGACGAGGCTCTTGA 111
CRa-Chinese TGCACATGGAATTAACCAGATTTACGAGGTGGAGCTTCCACCTGACGAAGAGGCTCTTGA 2485
***** * * *** * * *************** ************* ***********
Rsa10025569-CR-10 AATTTTCTGCATGTATGCTTTTGGCCAAAAGTCTCCACATGATGGATTTAAGGAACTTGC 2484
RSa10025569-XYB AATTTTCTGCATGTATGCTTTTGGCCAAAAGTCTCCACGTGGTGGATTTAAGGAACTTGC 2484
Rsa10025569-CR-60 AATTTTCTGCATGTATGCTTTTGGCCAAAAGTCTCCACGTGGTGGATTTAAGGAACTTGC 171
CRa-Chinese AATTTTCTGCATGAATGCTTTTTGTCAAAAATCTCCACCTGATGGCTTCAAGGAACTTGC 2545
************* ******** * ***** ******* ** *** ** ***********
Rsa10025569-CR-10 TTGCGAAGTTACAAAACTTGCCGGTGATCTTCCTTTGGGACTAAAGGTTATAGGATCTTA 2544
RSa10025569-XYB TTGTGAAGTTACAAAACTTGCCGGTGATCTCCCTTTGGGGCTAAAGGTTATAGGATCTTA 2544
Rsa10025569-CR-60 TTGTGAAGTTACAAAACTTGCCGGTGATCTCCCTTTGGGGCTAAAGGTTATAGGATCTTA 231
CRa-Chinese CTGGGAAGTTACAAGACTTGCAGGTAAGCTCCCTTTGGGACTGAGGGTTATGGGATCTCA 2605
** ********** ****** *** * ** ******** ** * ****** ****** *
Rsa10025569-CR-10 CTTCGAAGGAAGACCCAAGCAGGAGTGGGAAGAGGACCTACCAAGGTTAAGAAGTATACT 2604
RSa10025569-XYB TTTCGAAGGAAGGCCCAAGCAGGAGTGGGAAGAGGACCTACCAAGGTTAAGAAGTATACT 2604
Rsa10025569-CR-60 TTTCGAAGGAAGGCCCAAGCAGGAGTGGGAAGAGGACCTACCAAGGTTAAGAAGTATACT 291
CRa-Chinese TTTCAAAGGAAGGCCCAAGCATGAATGGGAAGAGGGACTACCAAGGTTAAGAACTAGACT 2665
*** ******* ******** ** ********** **************** ** ***
Rsa10025569-CR-10 TGATGGAGAAATAGAAAGTATTTTAAAGTTCAGTTATGATGCCTTATGCGTTGATGATCA 2664
RSa10025569-XYB TGATGGAGAAATAGAAAATATTTTAAAGTTCAGTTATGATGCCTTATGCGTTGATGATCA 2664
Rsa10025569-CR-60 TGATGGAGAAATAGAAAGTATTTTAAAGTTCAGTTATGATGCCTTATGCGTTGATGATCA 351
CRa-Chinese TAATGGAGAAATTGAAAATACTTTAAAGTTCAGTTATGATGCCTTATGCGATGACAATCA 2725
* ********** **** ** ***************************** *** ****
Rsa10025569-CR-10 AAATTTATTTCTTCATTTATCTTGCTTTTTCAACTATGAAACGCCTGAAA------TTGT 2718
RSa10025569-XYB AAATTTATTTCTTCATTTATCTTGCTTTTTCAATGATGAAATTGTGGAAAAAGAAATTGT 2724
Rsa10025569-CR-60 AAATTTATTTCTTCATTTATCTTGCTTTTTCAACTATGAAACGCCTGAAA------TTGT 405
CRa-Chinese AGCTATATTTCTTCACTTAGCATGCTTTTTCATCAATGAGCCGATTGAAA------ACGT 2779
* * ********** *** * ********** **** **** **
Rsa10025569-CR-10 GGAAGGGTGTCTTGCAAAGAAATTTGTTGGTGTGAAAGGTTGTCTCCGTGGTTTAATTGA 2778
RSa10025569-XYB GGAAGGGTGTCTCGAAAAGAATTTTGTTGGTGTGAAAGGTCGTCTCCGTGGTTTAGCTGA 2784
Rsa10025569-CR-60 GGAAGGGTGTCTTGCAAAGAAATTTGTTGGTGTGAAAGGTCGTCTCCGTGGTTTAGCTGA 465
CRa-Chinese GGAACGGTGTCTTGAAAAAAAAATTGTTGGTGTGAAAGGTTGTCTTCGTGTTTTAGCTGA 2839
**** ******* * *** ** ***************** **** **** **** ***
Rsa10025569-CR-10 GAAATCTTTCATATCATTTGAGGGGAGTCTATATATAGAGATCCATGATTTGCTAGCACG 2838
RSa10025569-XYB GAAATCTTTCATATCCATTGAGGGGA---TATATCTAGAAATCCATGATTTGCTAGCACG 2841
Rsa10025569-CR-60 GAAATCTTTCATATCCTTTGAGAGGAGTCTATATATAGAGATCCATGATTTGCTAGCACG 525
CRa-Chinese GAAATCTTTCATATCCTTTGAGTGGGG---ACGTATAAAGATGCATGATTTGCTAGCACT 2896
*************** ***** ** * * ** * ** ****************
Rsa10025569-CR-10 TTTTGGTAGAGAAATTGTTCGTAAACAATCCATTCGTGAACCTGGGCAGCGTCAGTTTTT 2898
RSa10025569-XYB TTTTGGTAGAGAAATTGTTCGTAAACAATCCATTCGTGAACCTGGGCAGCGTCAGTTTTT 2901
Rsa10025569-CR-60 TTTGGGTCGAGAAATTGTTCGTAAACAATCCATTCATGAACCTGGGAAGCGTCAGTTTTT 585
CRa-Chinese TTTGGGTAGAGAAATTGTTCGTAAACAATCCATTCATGAACCTGGGCAGCGTCAGTTTTT 2956
*** *** *************************** ********** *************
Rsa10025569-CR-10 GGTTGATGTTGGAGATATATGTCAAGTACTACGAGATGATGATAAACTAGTAAGTTTTTA 2958
RSa10025569-XYB GGTTGATGTTGGAGATATATGTCAAGTACTACGAGATGATGATAAACTAGTAAGTTTTTA 2961
Rsa10025569-CR-60 GGTTGATGCTGGAGATATATGCCAAGTACTACGTGATGATGATAAACTAGTAAGTTTTCA 645
CRa-Chinese GGTTGATGCTGGAGATATATGCCAAGTACTACGAAACG---ATACACTAGTAAGTTTTCA 3013
******** ************ *********** * * *** ************* *
Rsa10025569-CR-10 CATTAGTCGTTCACTGCATTTCTCCCTACAAAATTT-GATAAAATTCATCTTTGCTT--- 3014
RSa10025569-XYB CATTAGTCGTTCACTGCATTTCTCCCTACAAAATTT-GATAAAATTCATCTTTGCTT--- 3017
Rsa10025569-CR-60 AATTAGTCGTTCACTGCATTTCTCCCTACAAAATTTTAATAAAACTCATATTTCCTTATG 705
CRa-Chinese CATTAGTCATTTAATGCATTTCTCCCTA-----------TAAAAATCATATTTGTTT--- 3059
******* ** * ************** ***** **** *** **
Rsa10025569-CR-10 ---CTTTTTTTTTTGAACACACAAACTTTGCTT-ATGTATT-TTTGGGTTCTTTTTCAGG 3069	Exon 3
RSa10025569-XYB ---CTTTTTTTTTTGAACACACAAACTTTGCTT-ATGTATT-TT-GGGTTCTTTTTCAGG 3071
Rsa10025569-CR-60 TGTCTTTTTTTTTTGACCACACAAACTTTGCTTTATGTATCCTTTGGTTTCTTTTTCAGG 765
CRa-Chinese ----------------------------------GTGTATCGTT-GGGTTCTTTTGCAGG 3084
***** ** ** ******* ****
Rsa10025569-CR-10 GTAGTGGAAATGTTATAGGCATAGATCTGGACCTTTCAAAGTTGGAGACGGAGTTGAAGA 3129
RSa10025569-XYB GTAGTGGAAATGTTATAGGCATAGATCTGGACCTTTCAAAGTTGGAGACGGAGTTGAAGA 3131
Rsa10025569-CR-60 GTAGTCGAAATGTTATAGGCATAGATTTGGACCTTTCAAAGTTGGAGACGGAGTTGAAGA 825
CRa-Chinese GTAGTCGAAATGTTATAGGCATAGATTTGGACCTTACAAAGTTGGAGACGGAGGTGAAGA 3144
***** ******************** ******** ***************** ******
Rsa10025569-CR-10 TAAGTGATG--GAGTTTTTGCAAGAATGTCAAATGTCCAATTCTTAAGAGTCAGAAGATA 3187
RSa10025569-XYB TAAGTGATGTGGAGTTTTTGCAAGAATGTCAAATGTCCAATTCTTAAGAGTCAGAAGATA 3191
Rsa10025569-CR-60 TAAGTGACG--GAGTTTTTGCCAGAATGTCAAATGTCCAATTCTTAAGAGTCAAA---TA 880
CRa-Chinese TAAGTGACA--GAGTTTTTGAAAGAATGCCCAATGTCCAATTCTTAAGAGTCAAATATAG 3202
******* ********* ****** * ********************** *
Rsa10025569-CR-10 TTGTTTTCACAATATGCCATA---------------TCCCGTGACATGTCTGCCCCCAAA 3232
RSa10025569-XYB TTGTTTTCACAATATGCCATA---------------TCCCGTGACATGTCTGCCCCCAAA 3236
Rsa10025569-CR-60 TGGTTTTGACAGCATAGC------------------TCCCGTGACATGTCTTCCTCCAAA 922
CRa-Chinese AAGTATTCAGAGAAAGCCATATCCTCACAGCATAGATCCCGTGACATGTCTGCCCCCAAA 3262
** ** * * * * *************** ** *****
Rsa10025569-CR-10 TCTAAGAAATTTGTATTGGGATTCTTATCCGATGACATGTCTGCCTTCTAATTTTAATCC 3292
RSa10025569-XYB TCTAAGAAATTTGTATTGGGATTCTTATCCGATGACATGTCTGCCTTCTAATTTTAATCC 3296
Rsa10025569-CR-60 TCTAAGAATTTTGGATTGGGATTCTTTTCCAATGACATGTCTGCCTTCTAGTTTTAATCC 982
CRa-Chinese TCTAATTATCCTGCATTGGGATTATTTTCCGATGACATGTCTCCCTTCTAATTTTAATCC 3322
***** * ** ********* ** *** *********** ******* *********
Rsa10025569-CR-10 GGAGTTCCTGGTGAAATTAATCTTGACTGAAAGCAACTACCTTGAGAAATTATGGGAAGG 3352
RSa10025569-XYB GGAGTTCCTGGTGAAATTAATCTTGACTGAAAGCAACTACCTTGAGAAATTATGGGAAGG 3356
Rsa10025569-CR-60 GGAGTTCCTGGTGAAAATAATCTTGACTGAAAGCAACTACCTTGAGAAATTGTGGGAAGG 1042
CRa-Chinese GGAGTTCCTGACGAGAATAATCTTGACTGAAAACAACTACCTTGAGAAATTGTGGGAAGG 3382
********** ** * *************** ****************** ********
Rsa10025569-CR-10 AAATAAAGTAAGTAAAAAA-GTAATATTTGT-----ACTTTGATTTACTT---------- 3396
RSa10025569-XYB AAATAAAGTAAGTAAAAAA-GTAATATTTGT-----ACTTTGATTTACTT---------- 3400
Rsa10025569-CR-60 AAATAAAGTAAGTAAAAAA--TAATATTTGT-----ACTTTATATTACTTC--------- 1086
CRa-Chinese AAATAAAGTAAGTAAAATTTGTACTTTTTATTCGAAATTATAATTTGTCTTTCTGTGCAT 3442
***************** ** * *** * * * * ** *
Rsa10025569-CR-10 ATATTTTAGTTGA--CCGGTCTTCTTTT---------ATTGATGTTTTTCTTCTTCTACC 3445
RSa10025569-XYB ATATTTTAGTTGA--CCGGTCTTCTTTT---------ATTGATGTTTTTCTTCTTCTACC 3449
Rsa10025569-CR-60 ATATTTTATTAGAATCTGTTATTTGTCTTAATGGACCGTTAACCGTTTTCATCTTTTATT 1146
CRa-Chinese ATACGTTAGCTGAAAAAGGTTATCTTGTCT-----TAACGGACCGTCTTCTTTTATTGAT 3497
*** *** ** * * * * * * * *** * * *
Rsa10025569-CR-10 ------------TTATTTTTTTATGTTTCTGAACAGACTATTAGAAATCTCAAATTGATG 3493	Exon 4
RSa10025569-XYB ------------TTATTTTTTTATGTTTCTGAACAGACTATTAGAAATCTCAAATTGATG 3497
Rsa10025569-CR-60 GATGTTTTTCTTTTTCTTTTCCTTTTTTCTGTACAGACAATTAGAAATCTCAAATTGATG 1206
CRa-Chinese A--------TTTTTCCCCCCTTTTTTTCCTGTACAGACGATTAGAAATCTGAAATTGATG 3549
** * ** *** ****** *********** *********
Rsa10025569-CR-10 AATTTGTCGGATTCTGACAATCTAAAGGAGCTTCCTGATCTCTCAACTGCCACTAATCTG 3553
RSa10025569-XYB AATTTGTCGGATTCTGACAATCTAAAGGAGCTTCCTGATCTCTCAACTGCCACTAATCTG 3557
Rsa10025569-CR-60 AATTTGTCGGATTCCATAAATCTAACGGAGCTTCCTGATCTCTCAACTGCAACTAGTCTC 1266
CRa-Chinese AATTTGTCGAACTCCAAAAATCTAAAGGAGCTTCCCGATCTCTCAACTGCCACTAATCTG 3609
********* * ** ******* ********* ************** **** ***
Rsa10025569-CR-10 CAAACATTGAATCTTCGTGGTTGCTCAAGTCTAACTGAGCTCCCCTTTTCTATAGGAAAT 3613
RSa10025569-XYB CAAACATTGAATCTTCGTGGTTGCTCAAGTCTAACTGAGCTCCCCTTTTCTATAGGAAAT 3617
Rsa10025569-CR-60 CAAGAATTGAATCTTCGTGATTGCTCAAGTCTAACGGAGCTCCCTTTTTCTATTGGAAAT 1326
CRa-Chinese CAAACATTGGAGCTTTCTGGTTGCTCAAGTCTTACGGAACTCCCCTTTTCTATTGGAAAT 3669
*** **** * *** ** ************ ** ** ***** ******** ******
Rsa10025569-CR-10 GCTATCAATCTCCGAAAATTGGATCTTAGTGGATGTACAAGTCTGATGGAACTCCCCTCT 3673
RSa10025569-XYB GCTATCAATCTCCGAAAATTGGATCTTAGTGGATGTACAAGTCTGATGGAACTCCCCTCT 3677
Rsa10025569-CR-60 GCTATCAATCTCCGGCGTTTGGATCTTAGTCATTGCTCAAGTCTAGTGGAGCTCCCCTCT 1386
CRa-Chinese GCTATCAATCTCCGGCGTTTGAATCTTAGTCATTGCTCAAGTCTGATGGAACTCCCCTCT 3729
************** *** ******** ** ******* **** *********
Rsa10025569-CR-10 TCTATGGAAAATG----------------------------------------------- 3686
RSa10025569-XYB TCTATGGAAAATG----------------------------------------------- 3690
Rsa10025569-CR-60 TCTATGGAAAATA----------------------------------------------- 1399
CRa-Chinese TCTATGGAAAATGCCACTGATCTCGAGGAACTGAATCTCACGGGATGCTTACATCTAGCT 3789
************
Rsa10025569-CR-10 ------------------------------------------------------------
RSa10025569-XYB ------------------------------------------------------------
Rsa10025569-CR-60 ------------------------------------------------------------
CRa-Chinese AAGCTCCCATCCTCTATTGGTAATCTCAAGAAATTGTATCTCAAAGATTGCTCAAGTTTG 3849
Rsa10025569-CR-10 ----------------------------TCACTACTCTCGAGAAGTTGCTTCTCACGGGA 3718
RSa10025569-XYB ----------------------------TCACTACTCTCGAGAAGTTGCTTCTCACGGGA 3722
Rsa10025569-CR-60 ----------------------------TCACTACTCTCGAGAATTTACTTCTCACAGGA 1431
CRa-Chinese GTGGAGTTCCCCTCTTCTATGGAAAATGTCACTACTCTCGAGGAATTGCTTCTCACTGGA 3909
************** * ** ******** ***
Rsa10025569-CR-10 TGCTCACATATAGCTAACCTCCCATCCTCCATTGGTAATCTCAAGGTGTTGTATCTCCAA 3778
RSa10025569-XYB TGCTCACATATAGCTAACCTCCCATCCTCCATTGGTAATCTCAAGGTGTTGTATCTCCAA 3782
Rsa10025569-CR-60 TGCTCACATATAGCTAAGCTCCCATCCTCTATTGGTAATCTCAAGAGATTGTATCTAGAG 1491
CRa-Chinese TGCTCACATCTAGCTAATCTCCCACCTTCTATTGGTAATCTCAAGACGTTGTATCTCGAG 3969
********* ******* ****** * ** *************** ******** *
Rsa10025569-CR-10 AACTGCTCAAGTTTGGTGGAGCTTCCATCTTCTGTTATAAATTCCCTTAATCTCAAGGCA 3838
RSa10025569-XYB AACTGCTCAAGTTTGGTGGAGCTTCCATCTTCTGTTATAAATTCCCTTAATCTCAAGGCA 3842
Rsa10025569-CR-60 AATTGCTCAAGTTTGGAAGAGCTTCCATCTTCTGTTATAAATTCCTTTAATCTCAAGGCT 1551
CRa-Chinese AATTGCTCAAGTTTGGTGGAGCTTCCATCTTCTGTTAGAAATTCCATTAATCTCAAGAAT 4029
** ************* ******************* ******* ***********
Rsa10025569-CR-10 TTTGCTTGTAGTGGTTGTTCAAATCTTGTGGAGCTCCCTCTGTATATGGATACTGCCAGT 3898
RSa10025569-XYB TTTGCTTGTAGTGGTTGTTCAAATCTTGTGGAGCTCCCTCTGTATATGGATACTGCCAGT 3902
Rsa10025569-CR-60 TTTGCTTGTCGTGGTTGCACAAATCTTGTGGAGCTCCCTCTGTATATGGATACTGCCAGT 1611
CRa-Chinese TTTTCTTTTAATGGTTGCTCAAATCTTGTGGAGCTCCCTTTCTATCTTGGTAATGCCACT 4089
*** *** * ****** ******************** * *** * * ** ***** *
Rsa10025569-CR-10 TACCACAAGAAATTTGAGCTGAGAGGATGCTCAAGTCTACGGGAGCTCCCCTCTTCTATT 3958
RSa10025569-XYB TACCACAAGAAATTTGAGCTGAGAGGATGCTCAAGTCTACGGGAGCTCCCCTCTTCTATT 3962
Rsa10025569-CR-60 TACCCCAAGGAATTTGAGCTGAGAGGATGCTCAAGTCTACGGGAGCTCCCCTCTTCTATT 1671
CRa-Chinese GATCTCCAGAGATTGTATTTGAGAGGATGTTCAAGTCTACAGGAGCTTCCTTCTTCTATT 4149
* * * ** *** * ********** ********** ****** ** *********
Rsa10025569-CR-10 GGGAATATAACTAGTCTTGAGGAGTTGTATCTCGGTGGATGCTCAAGTCTTGTTGAGCTC 4018
RSa10025569-XYB GGGAATATAACTAGTCTTGAGGAGTTGTATCTCGGTGGATGCTCAAGTCTTGTTGAGCTC 4022
Rsa10025569-CR-60 GGGAATATAACTATTCTTGAGGATTTGTATCTCGGTGGATGCTCAAGTCTTGTTGAGCTC 1731
CRa-Chinese GGGAATATAACTCGTCTTGAGGAGTTGATTCTCGAAGAATGCTCAAGTCTTGTTGAGCTC 4209
************ ********* *** ***** * **********************
Rsa10025569-CR-10 CCTTCTTCCATTGGGAATATGACTA----------------------------------- 4043
RSa10025569-XYB CCTTCTTCCATTGGGAATATGACTA----------------------------------- 4047
Rsa10025569-CR-60 CCTTCTTCCATTGGGAGTATGACTA----------------------------------- 1756
CRa-Chinese CCTTCTTCTATCGGAAATATAACTAGTCTCGAGTACTTGAATCTTGATGCGTGTTCAAGT 4269
******** ** ** * *** ****
Rsa10025569-CR-10 ------------------------------------------------------------
RSa10025569-XYB ------------------------------------------------------------
Rsa10025569-CR-60 ------------------------------------------------------------
CRa-Chinese CTTGTGAAGCTCCCCTCTTCTATTGGAGATATAATCAATCTGAAGAACTTGTATCTTAAT 4329
Rsa10025569-CR-10 -------------------------------------------------ATCTCATGAAG 4054
RSa10025569-XYB -------------------------------------------------ATCTAAGGAAG 4058
Rsa10025569-CR-60 -------------------------------------------------ATCTCAGGAAG 1767
CRa-Chinese GGATGCTCAAGTCTTGTGGAACTCCCATCTTCTATTGGAAATATAAATTATCTCAAGAAG 4389
**** * ****
Rsa10025569-CR-10 CTGTCTCTTAATGGATGCTCAAGTCTTGTGAAGCTCCCCTCTTCTGTTGGGGATATGA-- 4112
RSa10025569-XYB TTGTCTCTTAATGGATGCTCAAGTCTTGTGAAGCTCCCCTCTTCTATTGGGGATATGA-- 4116
Rsa10025569-CR-60 CTGTCTCTTAATGAATGCACAAGTCTTGTGAAGCTCCCCTCTTCTATTGGGGATATGA-- 1825
CRa-Chinese TTGTCTCTTAATGGATGCTCAAGTCTGGTAGAGCTCCCCTCTTCCATTGGGAATATGACT 4449
************ **** ******* ** ************* ***** ******
Rsa10025569-CR-10 ------------------------------------------------------------
RSa10025569-XYB ------------------------------------------------------------
Rsa10025569-CR-60 ------------------------------------------------------------
CRa-Chinese AGTCTTGAAGAGTTGAATCTTAATGGATGCTCAAGTCTTGTGGAACTTCCATCTTCTATT 4509
Rsa10025569-CR-10 ----------GTAATCTCAGGGAGTTGTATCTCGAAAGATGCTCAAAGCTAACGGCCCTT 4162
RSa10025569-XYB ----------GTAATCTCAGGATCTTGTTTCTCGAAAGATGCTCAAAGCTAACGGCACTT 4166
Rsa10025569-CR-60 ----------GTAATCTCAGGATCTTGTTTCTCGAAAGATGCTCAAAGCTAACGGCACTT 1875
CRa-Chinese GGAAATATGAATAATCTCTGGATGTTGTATCTCGAAAGATGCTCCAACCTAACGGCCCTT 4569
******* ** **** *************** ** ******** ***
Rsa10025569-CR-10 CCGGTCAATATCAACATGAAATCTCTTGATACACTTAATCTCACTGACTGCTCGTCATTG 4222
RSa10025569-XYB CCTGTCAACATCAACATGAAATCTCTTGATACACTTAATCTCACTGACTGCTCGTCATTG 4226
Rsa10025569-CR-60 CCTGTCAACATCAACATGAAATCTCTTGATACACTTGTTCTCACTGATTGCTCGTCATTG 1935
CRa-Chinese CCGATCAATATCAACATGAAATCTCTTCGTGTACTTGCTCTCACAGACTGCTCGTCATTG 4629
** **** ****************** * **** ****** ** ************
Rsa10025569-CR-10 AAAGTCTTTCCCGAGATTTCCACAAACATCGGAGTTCTAAAGCTCACTGGAACTGCAATA 4282
RSa10025569-XYB AAAGTCTTTCCCGAGATTTCCACAAACATCGGAGTTCTAAAGCTCACTGGAACTGCAATA 4286
Rsa10025569-CR-60 AAAGTCTTTCCCGAGATTTCCACAAACATCGGAGTTCTAAAGCTCACTGGAACTGCAATA 1995
CRa-Chinese AAAAGCTTTCCGGAGATTTCCACAAACATCAGAGTTCTAAAGCTCACTGGAACTGCAATA 4689
*** ****** ****************** *****************************
Rsa10025569-CR-10 GAACAATTCCCTCCATCAATCATGTCATGGCCTCGTCTACGTGA--------------AC 4328
RSa10025569-XYB GAACAATTCCCTCCATCAATCATGTCATGGCCTCGTCTACGTGA--------------AC 4332
Rsa10025569-CR-60 GAACAATTCCCTCCATCAATCATGTCATGGCCTCGTCTACGTGA--------------AC 2041
CRa-Chinese GAAGAAATCCCTCCATCAATCATGTCATGGCCATGGCTTTCTGAGTTAAATATGTCATAC 4749
*** ** ************************* * ** *** **
Rsa10025569-CR-10 TTGTAA----TCAAGGGATG---------------------CACGAAGCTGGTTT----- 4358
RSa10025569-XYB TTGTAA----TCAAGGGATG---------------------CACGAAGCTGGTTT----- 4362
Rsa10025569-CR-60 TTGTAA----TCAAGGGATG---------------------CACGAAGCTGGTTT----- 2071
CRa-Chinese TTGGAGAACCTCAAGAAATCTCAGCATGCTTTATACCGCATCACGGACCTGCTTTTGAGT 4809
*** * ***** ** **** * *** ***
Rsa10025569-CR-10 -------------------CTCTTCCGCAGCTTCCGGA-------CTCCTTA-----GAA 4387
RSa10025569-XYB -------------------CTCTTCCGCAGCTTCCGGA-------CTCCTTA-----GAA 4391
Rsa10025569-CR-60 -------------------CTCTTCCGCAGCTTCCTGA-------CTCCTTA-----GAA 2100
CRa-Chinese GATACAGGAATACAAGAAACTGCTCCATGGGTCAAGAAGGAAAGGTCTCGTATACGTGAA 4869
** *** * * * * ** ***
Rsa10025569-CR-10 TGCCTAGTCG---------------------------CAGACAATTGTGGGTCCCTCGAA 4420
RSa10025569-XYB TGCCTAGTCG---------------------------CAGACAATTGCGGGTCCCTCGAG 4424
Rsa10025569-CR-60 TTCCTAGTCG---------------------------CAGACAATTGTGGGTCCCTCGAG 2133
CRa-Chinese CTTGTAATCAAGCGATGCACTGAGCAAGTTTCTTTTCCACAGGATTGTAAGTTCTGCAAG 4929
** ** ** * **** ** * * *
Rsa10025569-CR-10 AGACTAGATTGCTCTTTTAACAAGAAAAAGTTTAATGCGCTCTGCTTTGTTAACTGCTTT 4480
RSa10025569-XYB AGACTAGATTGCTCTTTTAACAAGAAAAGGTTTAATGCGCTCTGCTTTGTTAACTGCTTT 4484
Rsa10025569-CR-60 AGACTAGATTGCTCTTTTCACAAGAAAAAGTTTAATGCGCTCAGCTTTGTTAACTGCTTT 2193
CRa-Chinese AGACATCATTTCTCTCTTTACAAGCACAAGTCTAATGTGTTCATCGTTATCAACTGCCTT 4989
**** *** **** ** ***** * * ** ***** * ** * ** * ****** **
Rsa10025569-CR-10 AAACTGAATCAAGAAGCAAGTGACATTATCATCAACACATCGACAAGAGACTTTGCAATT 4540
RSa10025569-XYB AAACTGAATCAAGAAGCAAGAGACATTATCATCAACACATCGACAAGAGACTTTGCAATT 4544
Rsa10025569-CR-60 AAACTGAATCAAGCAGCAAGAGACCTTATCATCAACACATCGAAAAGAGACTTTGCAATT 2253
CRa-Chinese AAACTGAATCAAGAAACAAGAGACCTTATCATCAAGACATCGACAAGAGACTTTACAATT 5049
************* * **** *** ********** ******* ********** *****
Rsa10025569-CR-10 TTTCCAGGAGAAACAGTGCCTACGTGTTTCAGTTACCGAGCCACCGGGAGTACCATGTCA 4600
RSa10025569-XYB TTTCCAGGAGAAACAGTGCCTACGTGTTTCAGTTACCGAGCCACCGGGAGTACCATGTCA 4604
Rsa10025569-CR-60 TTTCCAGGAGAAACAGTGCCAACATATTTCACGTACCGAGCCACCGGGAGTACCATGTCA 2313
CRa-Chinese CTGCCCGGAGAAACAGTGCCCACATATTTCAGTTACCGAGCCGCCGGGAGTTCCCTGTCA 5109
* ** ************** ** * ***** ********* ******** ** *****
Rsa10025569-CR-10 ATGACGTGGAATGGATTAGATACACAGTACTTTCCTACATCCTTGAGATTTAAAGCTTGC 4660
RSa10025569-XYB ATGACGTGGAATGGATTAGATACACAGTACTTTCCTACATCCTTGAGATTTAAAGCTTGC 4664
Rsa10025569-CR-60 ATGACGTGGAGTGGATTAGATACACAGTACTTTCCTACATCCTTGAGATTTAAAGCTTGC 2373
CRa-Chinese ATGACGTGGAATGGATTAGATACAGAGTACTTTCCTACATCCTTGAGATTTAGAGCTTGC 5169
********** ************* *************************** *******
Rsa10025569-CR-10 CTCTTGCTGGTTTATAAGGGTGACGTGGATGCTGGTGATCGCCACTGGTCTGAAACAACT 4720
RSa10025569-XYB CTCTTGCTGGTTTATAAGGGTGACGTGGATGCTGGTGATCGCCACTGGTCTGAAATAACT 4724
Rsa10025569-CR-60 CTCTTGCTGGTTTATAAGGGTGACGTGGATGCTGGTGATCGCCACTGGTCTGAAACAACT 2433
CRa-Chinese CTCTTGCTGGTTTATAAGGGTCACGT---TGGTGGTCATCGGCAGTGGTCTGAAATAACT 5226
********************* **** ** **** **** ** ********** ****
Rsa10025569-CR-10 TATTGCATCAAGGACAAAGTGAGTGGTGTTAAACCAGTAAGTTATTCTTATAGATTGTTC 4780
RSa10025569-XYB TATTGCATCAAGGACAAACTGAGTGGTGTTAAACCAGTAAGTTATTCTTATAGATTGTTC 4784
Rsa10025569-CR-60 TATTGCATCAAGGACAAACTGAGTGGTGTTAAACCAGTAAGTTATTCTTATAGATTGTTC 2493
CRa-Chinese TATTGCATCAAGGACAAGCTCACTGGTGTTGAAC------GTTATTCTCATAGATTTGTC 5280
***************** * * ******* *** ******** ******* **
Rsa10025569-CR-10 GATTTGTCTCCAACTTCAGGGGAACATCTGTTAGTATTCGAAATTGAAGAAACTGTGAGT 4840
RSa10025569-XYB GATTTGTCTCCAACTTCAGGGGAGCATCTGTTAGTATTCGAAATTGAAGAAACTGTGAGT 4844
Rsa10025569-CR-60 GATTTGTCTCCAACTTCAGGGGAGCATCTGTTCGTATTCGAAATTGAAGAAACTGTGAGT 2553
CRa-Chinese AACTTGCCTCCAACTCCAGACGACCATCTGTTCGTATTCGAAATTGAAGAAACTGTGAGT 5340
* *** ******** *** ** ******** ***************************
Rsa10025569-CR-10 TCCCCCGAGATAGTCTTTGAGTTCGAACAAAAAAGCAAAAATTGGGAGATTAAAGAATGC 4900
RSa10025569-XYB TCCCCCGAGATAGTCTTTGAGTTCGAACACAAAAACAAAAATTGGGAGATTAAAGAATGT 4904
Rsa10025569-CR-60 TCCCCCGAGATAGTCTTTGAGTTCGAACAMAAAAGCAAAAATTGGGAGATTAAAGAATGC 2613
CRa-Chinese GCTCCTGAGTTAGTCTTTGAGTTTGGATTCACCAACAAAAATTGGGAGATTAAAAAATGC 5400
* ** *** ************* * * * * ******************* ****
Rsa10025569-CR-10 GGGATACATCCTCTAGAAACCTTGCCTCCCTCATGTTAATGTAAGCTGTG-----AAAAA 4960		TAGCCCTGGGCAAAAAAACCGGATCCGAAAAACCGAACCGAAACCGAACCAAAATAACCGAAACCGAAACCGGACCGAAATCCTAAAATACCCGAACGGTTTCTATATTTCTATATCCGAAAAACCGTAACCGAACCGAAACCGAACCGAGAACCGAATGGATATCCGAATATCCAAAAAATTAAGTTTAAGATTTCTGATATAAGGTAAAATGCCATCAATACCACTCGAACTTGAATTGGATATGAATAGTGAGAACAAAGTAAAATGTCATCAATACCACTCGAACCTGAATTGGAGAGGAAAGGTAAGAACATTGTTACCACGAGACCACATTGTCTTTCATYTACTYTYTTATATTATAAATTTTATATTAAAATAGAGTAAATACTTATAAAA…
RSa10025569-XYB GGGATACATCCTCTGGAAACCTTGGCTCCCTCATGTTAATGGAAGCTGTGAAGAAAAAAA 4941
Rsa10025569-CR-60 GGGGYACATCCTCTAGAAACCTTGGCTCCCTCATGTTAATGGAAGCTGTG-----AAAAA 2650
CRa-Chinese GGGCTACATCCTCTGGAAAC------TCCCTCATGTTAATGGAAGCTGTG---------- 5431
*** ********* ***** *************** ********
Rsa10025569-CR-10 -AAAACAAATCGCATATTTTCTCTAAATAACTTCTCTTTAGAAAACCTTTACTTTGAAG- 5080
RSa10025569-XYB -AAAACAAATCGCATATTTTCTCTAAATAACTTCTCTTTAAAAAAATCTTACTTTCAAGG 5002
Rsa10025569-CR-60 AAAAACAAATCGCAT--TTTCACTAAATAACTTCTCTTTAGAAAA-CCTTACTTTGAAG- 2705
CRa-Chinese AAAAACAAATCACAT--TTTCACTAA-TAACTTCTTTTTGAGAAAACCTTACTTTCAAG- 5480
*********** *** **** **** ******** *** *** ******* ***
Rsa10025569-CR-10 TTGATGTGAATCTTTTGCTGTATTGGTGTAAGATTATCATTGTGCTATGTTGGGTTTGAG 5139
RSa10025569-XYB TTGATGTGCATCTTTTGCTGTATTTGTGTAAGATTATCATTGTGCTATGTTGGGTTTGAG 5062
Rsa10025569-CR-60 TTGAAGTGCATCTTTTGCTGTATTTGTATAAGATTATCATTGTGCTATGTTGGATTTGAG 2763
CRa-Chinese TTGATGTGCATCTTTTGCTCTATTTGTATAAGATTATCATTGTGCTATGTTGGGTTTGAG 5539
**** *** ********** **** ** ************************* ******
Rsa10025569-CR-10 TACAAATGAG----CCGGCAT--------------------------------------- 5177
RSa10025569-XYB TACAAATGAG----CCGGCAT--------------------------------------- 5100
Rsa10025569-CR-60 TACAAATGAG----CCGGCAT--------------------------------------- 2801
CRa-Chinese TACAAATGTATGTACCGGCAT--------------------------------------- 5599
******** *******

## Sheet: Table S5
Table S5. Alignment of CRa, Rsa10025571 sequences in the CR-60, CR-10, and XYB36-2 reference genome. The CRa cabbage sequences were down loaded from GenBank (accession no. AB751516). Red arrows and blue box indicate primers location and four exons, respectively. Red box indicated position of termination codon.
Rsa10025571-XYB GGTTGAAGCCGAGGATGAAGCTT--CCTGAGAA---GATTGATCTCTTTTCTGTGAAATT
Rsa10025571-CR-10 GGTTGAAGCCGAGGATGAAGCTT--CCTGAGAA---GATTGATCTCTTTTCTGTGAAATT
Rsa10025571-CR-60 GGTTGAAGCCGAGGATGAAGCTTATCCTGAGAATTAGATTGATCTCTTTGCTCTGAAATT
CRa-Chinese AGTTGAAGCCCATGATGAAACTT--CCAGAGAA---GATTAATCTCTTCGCTGTAAAATT
********* * ****** *** ** ***** **** ******* ** * *****
Rsa10025571-XYB TCTAGTGTGACCTCGTCAATTTTGATGTAGAGACAGTGATATCGATCA-CTACTTTCTTG
Rsa10025571-CR-10 TCTAGTGTGACCTCGTCAATTTTGATGTAGAGACAGTGATATCGATCA-CTACTTTCTTG
Rsa10025571-CR-60 TCAAGTGTGACCTCGTCAATTTTGATGTAGAGACATTGACATCGACCAACTACTTTCTTG
CRa-Chinese TCAAGTGTGAACTCATTAATATTGATGTAGAGACACTGATGTCAATCA-CTACTTCCTTG
** ******* *** * *** ************** *** ** * ** ****** ****
Rsa10025571-XYB AAGTTGCTTATGTTCTTCCTTGCATTTTCCCTTCTTTGAATAGGATGTCC--AACCCCCA
Rsa10025571-CR-10 AAGTTGCTTATGTTCTTCCTTGCATTTTCCCTTCTTTGAATAGGATGTCC--AACCCCCA
Rsa10025571-CR-60 AAGTTGCTTCTGTTCTTCCTTGCCTTTTCCCTTCTTTGAATAGGATGCCC--AACCCCCA
CRa-Chinese AAGTTGCTTCAGCTCTTCCTTGCCTTTTCC-TCCTTAGCATAGGATGCCCCCAACGCACT
********* * ********** ****** * *** * ******** ** *** * *
Rsa10025571-XYB ACCA--------------------TTCAACTTTAGGCACA-GTTATTTTGACCGGTGAAA
Rsa10025571-CR-10 ACCA--------------------TTCAACTTTAGGCACA-GTTATTTTGACCGGTGAAA
Rsa10025571-CR-60 ACCAATACAAAGAATGGTGGAGCATTCAACTTTAGGCACA-GTTATTTTGACCGGTGAAA
CRa-Chinese GTTCCCACTACAAA----------GAATGGTGGAGCCATGCATTACCTTTATCTGTGAAT
* ** ** *** ** * * *****
Rsa10025571-XYB TTATTT---CCACCAAGTCTATCTCAGTCCCCCACAATGGAGTCAACGTCTAATGTCCCA
Rsa10025571-CR-10 TTATTT---CCACCAAGTCTATCTCAGTCCCCCACAATGGAGTCAACGTCTAATGTCCCA
Rsa10025571-CR-60 TTATTT---CCACAAAGTCTTTCTCAGTCCCCTA--ATGGAGTCAACGTCGAATGTCCCA
CRa-Chinese TTTTTTTCACCACAAAGTCTCTCTCAGTC------AACGGAGTCAACTTTTCATGTAGCT
** *** **** ****** ******** * ********* * **** *
Rsa10025571-XYB TTGTTCAATTAAGCAAAAAGCCTCTTTGTTTCGCTCTTTGCTCCACAAATCTATGTACCA
Rsa10025571-CR-10 TTGTTCAATTAAGCAAAAAGCCTCTTTGTTTCGCTCTTTGCTCCACAAATCTATGTACCA
Rsa10025571-CR-60 TTGTTCAATTACGCAAAAAACCTCTTTGTTTTACTCTTTGCTCCACAAATCTATGTACCA
CRa-Chinese TTGTTCAATTATACAAAAAGCATCTTTGTTTCACTCTTTGCTCCACAA---TCAGTAGCA
*********** ****** * ********* *************** * *** **
Rsa10025571-XYB AGCTCACTGATCCTTTCTCCATTACCACACAAATGGATCTCTCTCTTTTCCTTACCATCG	Exon 1
Rsa10025571-CR-10 AGCTCACTGATCCTTTCTCCATTACCACACAAATGGATCTCTCTCTTTTCCTTACCATCG
Rsa10025571-CR-60 AGCTCACTAATCCTTTCTCCATTATCACACGAATGGATTTATCTCTTTTCCTTACCATAG
CRa-Chinese AGCTCATTGATCCTTTTCCC--CACCTCACAAATGGATTTCTCTCTTTTCCTTACCATCG
****** * ******* ** * * *** ******* * ***************** *
Rsa10025571-XYB TTGCTGCTGCAATAGGCTTCTTCTTGATTTTTCGAAAACTCAGATCCCATCAAGAAAACA
Rsa10025571-CR-10 TTGCTGCTGCAATAGGCTTCTTCTTGATTTTTCGAAAACTCAGATCCCATCAAGAAAACA
Rsa10025571-CR-60 TTGCTGCTGCAATAGGCTTCTTCTTGATTTTTCGAAAAATCAGACTCCATCAAGAAAACA
CRa-Chinese TTGCTGCTGCAATAGGTTTCTTCGTGATT---CGAAGATTCAGATTCAATCCAGAAAACA
**************** ****** ***** **** * ***** * *** ********
Rsa10025571-XYB AAGAA------------TTCTCGTCTCCATCATCACCACCATCTTCTTT---------GT
Rsa10025571-CR-10 AAGAA------------TTCTCGTCTCCATCATCACCACCATCTTCTTT---------GT
Rsa10025571-CR-60 AAGAA------------TT----------TGATA--------CTTCCTC---------TT
CRa-Chinese ATGAAATCGATACTTCGTCTTTGTCTCCATCATCACCACCATCTTCTTTATCTTCTAGGT
* *** * * ** **** * *
Rsa10025571-XYB CTTCGTCTACATCATCAACTCCATCTACTTTATCTATTTCATCAGCTTCTCCATCTTCTT
Rsa10025571-CR-10 CTTCGTCTACATCATCAACTCCATCTACTTTATCTATTTCATCAGCTTCTCCATCTTCTT
Rsa10025571-CR-60 CTTTGTCTACTTCATCACCACCATCTTCTTTATCTTCTTCGCCAGTTCCTCAATCTTCTT
CRa-Chinese CTTTGTCTACATCATCAACTCCATCTGCTTTGTCTCCTTCATCGGCTTCTCCATCTTCTT
*** ****** ****** * ****** **** *** *** * * * *** ********
Rsa10025571-XYB CCTCTCACGTCTGGTTACACGATGTCTTTCCGAGCTTCCGCGGGGAAGATGTCCGCGATA
Rsa10025571-CR-10 CCTCTCACGTCTGGTTACACGATGTCTTTCCGAGCTTCCGCGGGGAAGATGTCCGCGATA
Rsa10025571-CR-60 CTTCTCACGTCTGGATACACGATGTCTTTCCGAGCTTCCGTGGGGAAGATATCCGCAAAA
CRa-Chinese CCTCTCATGTCTGGATGTACGATGTCTTTCCGAGCTTCCGTGGGGAAGATGTCCGCTACA
* ***** ****** * ********************** ********* ***** * *
Rsa10025571-XYB ACTTTCTTAGTCACATTAAAAAGGAGTTTGAAAGAAAGACAATCACATTTTTCAACGATA
Rsa10025571-CR-10 ACTTTCTTAGTCACATTAAAAAGGAGTTTGAAAGAAAGACAATCACATTTTTCAACGATA
Rsa10025571-CR-60 ACTTTCTCAGTCACATACAAAAGGAGTTTACAAGAAAGGGAATCACACTATTCAAAGATA
CRa-Chinese ACTTTCTCAGTCACATTAAAAAGGAGTTTAAAAGGAAGACAATCACATTTTTCAACGATA
******* ******** *********** *** *** ******* * ***** ****
Rsa10025571-XYB ACGGGATCAAGAGAGGAGAATCCATCGGTCCCGAACTAATACAGGGGATTAGAGGATCTA
Rsa10025571-CR-10 ACGGGATCAAGAGAGGAGAATCCATCGGTCCCGAACTAATACAGGGGATTAGAGGATCTA
Rsa10025571-CR-60 ATGGGATCAAGAGAGGAGAATCCATCGGACCCGAGCTCATGAGGGGGATTAGAGGATCTA
CRa-Chinese ATGGGATCGAGAGAGGAGAATCCATCGCTCCTGAACTCATACAGGGGATTAGAGGATCTA
* ****** ****************** ** ** ** ** *****************
Rsa10025571-XYB AGATCGCGATCGTCTTGCTCTCCACCAACTACGCTTCTTCAAAGTGGTGTCTTGAGGAGT
Rsa10025571-CR-10 AGATCGCGATCGTCTTGCTCTCCACCAACTACGCTTCTTCAAAGTGGTGTCTTGAGGAGT
Rsa10025571-CR-60 AGATCGCCATCATCTTGCTCTCGAGGAACTATGCTTCTTCAAAATGGTGTCTTGAGGAGT
CRa-Chinese AGATTGCGATCGTCTTGCTCTCTACGAACTACGCTTCTTCAAAGTGGTGTCTTGAGGAGT
**** ** *** ********** * ***** *********** ****************
Rsa10025571-XYB TGGTGGAGATTATGAAGTGCAGGGAGGAGCTGGGTCAAACTGTGATTGCTATTTTCTATA
Rsa10025571-CR-10 TGGTGGAGATTATGAAGTGCAGGGAGGAGCTGGGTCAAACTGTGATTGCTATTTTCTATA
Rsa10025571-CR-60 TGGTGGAGATTATGAAGTGCAGGGAGGAGCTGGGTCAAACTGTGATGGCTATTTTCTGTA
CRa-Chinese TGGTGGAGATTATGAAGTGCAGGGAGGAGCTTGGTCAAACTGTGATTGCTATTTTCTACA
******************************* ************** ********** *
Rsa10025571-XYB AAGTTGATCCATCTCATGTAAAGAAGCTGACCGGTGATTTTGGGAAGGTTTTCAGAAATA
Rsa10025571-CR-10 AAGTTGATCCATCTCATGTAAAGAAGCTGACCGGTGATTTTGGGAAGGTTTTCAGAAATA
Rsa10025571-CR-60 AAGTAGATCCATCTGATGTAAAGAAGCTGACCGGAGACTTTGGGAAGGTTTTCAGGAAAA
CRa-Chinese AAGTAGATCCATCTGACGTAAAGAAGCTGACCGGAGACTTTGGGGAGGTTTTCAGAAAGA
**** ********* * ***************** ** ****** ********** ** *
Rsa10025571-XYB CTTGTAAGGGTCAAGCTAAGGAGGACATTTGGAGATGGAAACAAGCTTTGGAGAAAGTCG
Rsa10025571-CR-10 CTTGTAAGGGTCAAGCTAAGGAGGACATTTGGAGATGGAAACAAGCTTTGGAGAAAGTCG
Rsa10025571-CR-60 CTTGTGAGGGTCAAGCGAAGGAGGACATTTGGAGATGGAAACAAGCCTTGGAGAAGGTGG
CRa-Chinese CTTGTAAGGGTAAAGCTAAGGAGGAGATTAGGAGGTGGGAACAAGCTTTGGAGAAGGTGG
***** ***** **** ******** *** **** *** ******* ******** ** *
Rsa10025571-XYB CCACAATAGCTGGTTACCATTCATGCAACTGGTTT-GTCCTTTTGACTTTTACCTGCTAT
Rsa10025571-CR-10 CCACAATAGCTGGTTACCATTCATGCAACTGGTTT-GTCCTTTTGACTTTTACCTGCTAT
Rsa10025571-CR-60 CCACAATAGCTGGTTACCATTCAAGCAACTGGTTTTGTCCCCATGCTTTCTACTTGCTAT
CRa-Chinese CCGTAATAGCTGGTTACCATTTATCCAACTGGTTT-GTCCGCTTAACTTTTACTTGCTAT
** ***************** * ********** **** * ** *** ******
Rsa10025571-XYB CTTTCAAACACATCCAAAAA---ATAACATGTATTG------------------------
Rsa10025571-CR-10 CTTTCAAACACATCCAAAAA---ATAACATGTATTG------------------------
Rsa10025571-CR-60 CTTTCAGATACATCCAAAAATATATAATATGTATTAGAAATACAAGTGTTTCAAAAAAAA
CRa-Chinese CTTTCAAACACATCCACAAC-ATATGATATGTATAGAAAAAATACTC-----------AA
****** * ******* ** ** * ******
Rsa10025571-XYB --------AGAAATACGAAAA------TTGAAAATGATTT-----------------AAT
Rsa10025571-CR-10 --------AGAAATACGAAAA------TTGAAAATGATTT-----------------AAT
Rsa10025571-CR-60 AAAGTATTAGAAATACAAAAAAAAACTTTAAAAATGGTTTCAATATAACAAGATTTAAGA
CRa-Chinese AATATGAAACAAAAATAAACAAAATTTTCAAAAATATGACAAGAGT--TTAGGTTTACGA
* *** * ** * * *****
Rsa10025571-XYB AGTGGTTTCAAAAACATCA------------------CAGAGCATAGGTTTACGAGTGA-
Rsa10025571-CR-10 AGTGGTTTCAAAAACATCA------------------CAGAGCATAGGTTTACGAGTGA-
Rsa10025571-CR-60 AATGGTTTCAAAAACATCAAATGATAATTTTATAAAACAAAATGTAAAATTACTAGTAAC
CRa-Chinese AAGAGTCCATAAAAGTTTAC-------TACGGTCTCCTAAAATTTTAGAAACGTAATAAA
* ** **** * * * * * * * *
Rsa10025571-XYB ----TCTCCTTCTAAAACTATA--GAAGCCTAAGTTATTGCATTATAAAAAATGGTCTCG
Rsa10025571-CR-10 ----TCTCCTTCTAAAACTATA--GAAGCCTAAGTTATTGCATTATAAAAAATGGTCTCG
Rsa10025571-CR-60 AAAATGTGTTTGTTAGTTCGTTTTGTATTGAAAGTTTGTTATACATGTAAAAATGTGTTA
CRa-Chinese GTTGTGGCGTTTTCAAATTTTTATGATTTCGGTTATAATTTTGGAACAGAAAAAATGTAA
* ** * * * * * * * *** * *
Rsa10025571-XYB GTGATA--ATTTTAGAAA--ACAAAATGTGAAAGTTTGTTAAAAAAAAATAATTGTATAC
Rsa10025571-CR-10 GTGATA--ATTTTAGAAA--ACAAAATGTGAAAGTTTGTTAAAAAAAAATAATTGTATAC
Rsa10025571-CR-60 AAAATT--GTTATACATGT-AAAAAATGCTTAAACTTTTTTTTTGCTTATTTTTATACAA
CRa-Chinese GTTCTTCCATTTTTCTAGTCACGTAATGTGAAAG-TTATACATGCTTAATTTTTATACCA
* ** * * **** ** ** * ** ** **
Rsa10025571-XYB AATTTTAAATTAAA----------AACGCTTGATCATTTCTTTATCAATTTTGTTTTT--
Rsa10025571-CR-10 AATTTTAAATTAAA----------AACGCTTGATCATTTCTTTATCAATTTTGTTTTT--
Rsa10025571-CR-60 AACTTAAAATAAAATAAAACCCTTAAAATTTGATCAACTCTTTGTCAATTTTTTTTTTTT
CRa-Chinese AAATTAAAAATAGT----------AAACTTTTATCATCTCTGTATCAATTTTGTCTCT--
** ** *** * ** ** **** *** * ******** * * *
Rsa10025571-XYB -GACTATGTATTGTAAATTTTTAAGTGATGTA-TTCATCT-------------TTTCCCA
Rsa10025571-CR-10 -GACTATGTATTGTAAATTTTTAAGTGATGTA-TTCATCT-------------TTTCCCA
Rsa10025571-CR-60 TGATTATGTATTGTATTTTTTCAAATGATGTA-TTCATCTCTGTGTATTATCTTTTCCCT
CRa-Chinese -GATTGTGTGTAGTAAATTTAATGACTATATAGTTGATGTTT-----TCTTCTCTCCTCT
** * *** * *** *** ** ** ** ** * * * *
Rsa10025571-XYB TGTTAGGGATAATGAAGCATCAATGGTCGAAGAAATCGCCAAAGACATTTCAAATAAGCT	Exon 2
Rsa10025571-CR-10 TGTTAGGGATAATGAAGCATCAATGGTCGAAGAAATCGCCAAAGACATTTCAAATAAGCT
Rsa10025571-CR-60 TGTTAGGGATGATGAAGCATCAATGGTCGAAGAAATCGCCACTGATGTTTCCAGTGACCT
CRa-Chinese TTCTAGGGATGATGAAGCTACCGTGATCGAGAATATATCAACATGTGTTTTAAACAAGCT
* ******* ******* * ** **** * ** * * *** * * **
Rsa10025571-XYB GATTAGTATTGTGCCATCAAGTGATTTCGAAGGTTTTGTTGGGATGGAAGCTCATATGAA
Rsa10025571-CR-10 GATTAGTATTGTGCCATCAAGTGATTTCGAAGGTTTTGTTGGGATGGAAGCTCATATGAA
Rsa10025571-CR-60 AATTAATTTTGTGATATCAAGTGATTTCGAAGGTTTTGTTGGGATGGAAGCTCATATGGA
CRa-Chinese GGTTAATTCTCCACAACCGAGTCATTTCGACAATCTAGTTGGGATGAGTACTCATATGGA
*** * * * * *** ******* * * ********* ******** *
Rsa10025571-XYB AAAGATGGAGCCGTTCTTACTCTTAGGCTCCAAGGAAGTGAGGATAATAGGGATTTGGGG
Rsa10025571-CR-10 AAAGATGGAGCCGTTCTTACTCTTAGGCTCCAAGGAAGTGAGGATAATAGGGATTTGGGG
Rsa10025571-CR-60 AAATATGGAGCCGTTCTTACTCTTAGGCTCCAATGAAGTGAGGATGATAGGGATTTGGGG
CRa-Chinese AAATCTGGAACTGTTGTTAAGCCTGGGCTCCAAGGAAGTGAGGATGGTAGGGATTTGGGG
*** **** * *** *** * * ******** *********** *************
Rsa10025571-XYB TCCATCTGGAATTGGTAAGAGCACCATCGCTAGGGTTCTATATAGCAAATACTCTCATCA
Rsa10025571-CR-10 TCCATCTGGAATTGGTAAGAGCACCATCGCTAGGGTTCTATATAGCAAATACTCTCATCA
Rsa10025571-CR-60 TCCTTCTGGAATTGGTAAGAGCACCATCGCCAGAGTTCTATTTAGCCAACATTCTCATGA
CRa-Chinese TCCTTCTGGAATTGGTAAGAGCACCATCGCCAGAGTTCTATTCAACCAACACTCTCATCA
*** ************************** ** ******* * * ** * ****** *
Rsa10025571-XYB CTTCCAACTTAGTGTCTTCATGGAGAATATTAAAAGACGTTGTCTGAGACCTTATTACGA
Rsa10025571-CR-10 CTTCCAACTTAGTGTCTTCATGGAGAATATTAAAAGACGTTGTCTGAGACCTTATTACGA
Rsa10025571-CR-60 ATTCCAGCTTTGTGTCTTCATGGAGGATATCAAAAGACACTGTCCAAGATCTTATTCCAA
CRa-Chinese GTTCCAATTTAGTGTCTTTATGGAGAACATTAAAAGACTTTGGCCCAGACCTTATTACGA
***** ** ******* ****** * ** ******* ** * *** ****** * *
Rsa10025571-XYB TGAGTACAGTGCGAAACTGCAATTACAGGAAGAGTTTCTGTCCCAAATAATCAACCAAGA
Rsa10025571-CR-10 TGAGTACAGTGCGAAACTGCAATTACAGGAAGAGTTTCTGTCCCAAATAATCAACCAAGA
Rsa10025571-CR-60 TGAATATAGCGTGAAACTGCAATTACAGGAAGAGTTCTTATCTAAAATAATCAACCAGGA
CRa-Chinese TGAGTACAGTGTGAAACTGCAACTACAAGAAGAGTTCCTGTCCCGGGTAATCAACCAAAA
*** ** ** * ********** **** ******** * ** ********** *
Rsa10025571-XYB AGATATCAAGATTCATCATTTAGGAGTTGTGCAAGACAGGTTAAAAGACAAGAGAGTGCT
Rsa10025571-CR-10 AGATATCAAGATTCATCATTTAGGAGTTGTGCAAGACAGGTTAAAAGACAAGAGAGTGCT
Rsa10025571-CR-60 AGATATCAAGATTCATCATTTAGGAGTTGCGCCAGACAGGTTAAAAGACAAGAGAGTGCT
CRa-Chinese AGATATCAAGATTCAGCAATTAGGAGTTGTGGAAGACAGGTTAAAGGACAAGAGAGTGCT
*************** ** ********** * ************ **************
Rsa10025571-XYB TGCCGTTCTTGATGACGTGGACCATTCGTTGCAAATAGATGCCATGGCTAAAGAAGCTCG
Rsa10025571-CR-10 TGCCGTTCTTGATGACGTGGACCATTCGTTGCAAATAGATGCCATGGCTAAAGAAGCTCG
Rsa10025571-CR-60 TATCGTTCTGGATGATGTAGACCATTTGATGCAACTAGATGCCATGGCCAAAGACCATAG
CRa-Chinese TGCCATTCTTGATGACGTGGATCATTTGTTGCAAATAGAAGCCATAGCTAAAGAAGCTCG
* * **** ***** ** ** **** * ***** **** ***** ** ***** * *
Rsa10025571-XYB GTGGTTTGGTCCTGGAAGTCGAATAATCATTACAACACAAGATAAAAAGCTTCTAAATGC
Rsa10025571-CR-10 GTGGTTTGGTCCTGGAAGTCGAATAATCATTACAACACAAGATAAAAAGCTTCTAAATGC
Rsa10025571-CR-60 CTGGTTTGGTCCTGGAAGTCGGATTATTGTCACAACGCAAGATAAAAAAATCTTGACTGC
CRa-Chinese GTGGTTTGGTCCTGGAAGTTGGATAATCATCACAACACAAGATAAAAGGCTTTTATATGC
****************** * ** ** * ***** ********** * * ***
Rsa10025571-XYB ACATGGGATTAACCATATTTACAAGGTGGAGTTTCCACCAGACGATGAGGCTCTTGAAAT
Rsa10025571-CR-10 ACATGGGATTAACCATATTTACAAGGTGGAGTTTCCACCAGACGATGAGGCTCTTGAAAT
Rsa10025571-CR-60 ACATGGGATTAACCATATTTACAAGGTTGAGTTTCCAGGTTTCAGTGATGCTTTTGAAAT
CRa-Chinese ACATGGAATTAACCAGATTTACGAGGTGGAGCTTCCACCTGACGAAGAGGCTCTTGAAAT
****** ******** ****** **** *** ***** * ** *** *******
Rsa10025571-XYB TTTCTGTATGTATACTTTTGGTCAAAAATCCCCATACGATGACTTCAAGAAACTTGCTTG
Rsa10025571-CR-10 TTTCTGTATGTATACTTTTGGTCAAAAATCCCCATACGATGACTTCAAGAAACTTGCTTG
Rsa10025571-CR-60 TTTCTGCATGTATGCTTTTGGTCAAAAGTCCCCATATGATGGCTTCGAGAAACTTGCTTG
CRa-Chinese TTTCTGCATGAATGCTTTTTGTCAAAAATCTCCACCTGATGGCTTCAAGGAACTTGCCTG
****** *** ** ***** ******* ** *** **** **** ** ******* **
Rsa10025571-XYB GGAAGTTACAAAACTTGCTGGTAACCTCCCTCTGGGACTAAAGGTCATGGGATCTTATTT
Rsa10025571-CR-10 GGAAGTTACAAAACTTGCTGGTAACCTCCCTCTGGGACTAAAGGTCATGGGATCTTATTT
Rsa10025571-CR-60 GGAAGCTAAAGAATTTGCCGGTAATCTCCCTCTGGGACTAAAGGTAATGGGATCTTATTT
CRa-Chinese GGAAGTTACAAGACTTGCAGGTAAGCTCCCTTTGGGACTGAGGGTTATGGGATCTCATTT
***** ** * * **** ***** ****** ******* * *** ********* ****
Rsa10025571-XYB CAAGGGAATGCCCAAGGAGGAGTGGGAAGAGGAACTACCAAGGTTAAGAACTAGTCTTGA
Rsa10025571-CR-10 CAAGGGAATGCCCAAGGAGGAGTGGGAAGAGGAACTACCAAGGTTAAGAACTAGTCTTGA
Rsa10025571-CR-60 CAAAGGAATGCTCAAGCATGAGTGGCAAGAGGAACTACCAAGGTTAAGAACTAGACTTGA
CRa-Chinese CAAAGGAAGGCCCAAGCATGAATGGGAAGAGGGACTACCAAGGTTAAGAACTAGACTTAA
*** **** ** **** * ** *** ****** ********************* *** *
Rsa10025571-XYB TGGAGAAATAGAAAGTATTTTAAAATTCAGTTATGATGCCTTATGCGTTGATAATCAAGA
Rsa10025571-CR-10 TGGAGAAATAGAAAGTATTTTAAAATTCAGTTATGATGCCTTATGCGTTGATAATCAAGA
Rsa10025571-CR-60 TGGAGAAATAGAAAGTAGTTTAAAGTTACGTTATGATGCCTTATGTGTTGATTCTCAAGA
CRa-Chinese TGGAGAAATTGAAAATACTTTAAAGTTCAGTTATGATGCCTTATGCGATGACAATCAAGC
********* **** ** ****** ** **************** * *** *****
Rsa10025571-XYB TTTATTTCTTCATTTAGCTTGCTTTTTCAACGGTCAACTAGTTAAGAGAGTGGAAGATTG
Rsa10025571-CR-10 TTTATTTCTTCATTTAGCTTGCTTTTTCAACGGTCAACTAGTTAAGAGAGTGGAAGATTG
Rsa10025571-CR-60 TTTATTTCTTCATTTAGCTTGCTTGTTCAACAATGAGCAGATTGAGAAAGTGGAAGAGTA
CRa-Chinese TATATTTCTTCACTTAGCATGCTTTTTCATCAATGAGCCGATTGAAAACGTGGAACGGTG
* ********** ***** ***** **** * * * * ** * * ****** *
Rsa10025571-XYB CCTGGCAAAGAATTTCGTGGGTGTGAAAAGTCATCTCCGTGTTTTAGTTGAGAAATGTTT
Rsa10025571-CR-10 CCTGGCAAAGAATTTCGTGGGTGTGAAAAGTCATCTCCGTGTTTTAGTTGAGAAATGTTT
Rsa10025571-CR-60 TCTTGCAAGGAATTTTGTCGGTGTGAAAGGACAGCTCCGTGTTCTAAGTGAGAAATCTTT
CRa-Chinese TCTTGAAAAAAAAATTGTTGGTGTGAAAGGTTGTCTTCGTGTTTTAGCTGAGAAATCTTT
** * ** ** * ** ********* * ** ****** ** ******** ***
Rsa10025571-XYB CATATCCATTGACACGGGGTTTATAAGGATCCATGGTTTGCTAGCACGTTTGGGTAGAGA
Rsa10025571-CR-10 CATATCCATTGACACGGGGTTTATAAGGATCCATGGTTTGCTAGCACGTTTGGGTAGAGA
Rsa10025571-CR-60 CATGTCCATTGATAGGGGATATATAAAGATCCATGATTTGCTAGCACGTTTGGGTAGAGA
CRa-Chinese CATATCCTTTGAGTGGGGACGTATAAAGATGCATGATTTGCTAGCACTTTTGGGTAGAGA
*** *** **** *** ***** *** **** *********** ************
Rsa10025571-XYB AATTGTTCGTAAACAATCCATTCACGACCCTGGGAAGCGTCAGTTTTTGGTTGATGCTGG
Rsa10025571-CR-10 AATTGTTCGTAAACAATCCATTCACGACCCTGGGAAGCGTCAGTTTTTGGTTGATGCTGG
Rsa10025571-CR-60 AATTGTTCGTAAACAATCCATTCACGACCCTGGGCAGCGTCAGTTTTTGGCTGATGTTGG
CRa-Chinese AATTGTTCGTAAACAATCCATTCATGAACCTGGGCAGCGTCAGTTTTTGGTTGATGCTGG
************************ ** ****** *************** ***** ***
Rsa10025571-XYB AGATATATGCCAAGTACTACGTAATGATACACTAGTAAGTTTTC--------ACATTTG-
Rsa10025571-CR-10 AGATATATGCCAAGTACTACGTAATGATACACTAGTAAGTTTTC--------ACATTTG-
Rsa10025571-CR-60 AGATATATGCCAAGTACTACAAAATGATACACTAGTAAGTTTTTCCTATTAGGCATTCAC
CRa-Chinese AGATATATGCCAAGTACTACGAAACGATACACTAGTAAGTTTTCAC-ATTAGTCATTTAA
******************** ** ****************** ****
Rsa10025571-XYB ------------------------------------------------------AGGGTA
Rsa10025571-CR-10 ------------------------------------------------------AGGGTA
Rsa10025571-CR-60 TGCATTTCTCCCTACAAAA------TTTTATAGTAAATCATTGGGTTCTTTTGCAGGGTA
CRa-Chinese TGCATTTCTCCCTATAAAAATCATATTTGTTTGTGTATCGTTGGGTTCTTTTGCAGGGTA
******
Rsa10025571-XYB GTCCAAGTGTTATAGGCATAAATTTGAGCCTATTAAAGTTGGAG---GAGGTAAAGATAA	Exon 3
Rsa10025571-CR-10 GTCCAAGTGTTATAGGCATAAATTTGAGCCTATTAAAGTTGGAG---GAGGTAAAGATAA
Rsa10025571-CR-60 GTCGAAAAGTCATAGGCATAGATTTGAAGCTTTTAGAGTTGAAGACGGAGTTGAAAATAA
CRa-Chinese GTCGAAATGTTATAGGCATAGATTTGGACCTTACAAAGTTGGAGACGGAGGTGAAGATAA
*** ** ** ********* ***** ** * ***** ** *** * ** ****
Rsa10025571-XYB ATAACGGAGCCTTTGAAAGGATGTCCAACGTCCAGTTCTTAAGGCTC-------------
Rsa10025571-CR-10 ATAACGGAGCCTTTGAAAGGATGTCCAACGTCCAGTTCTTAAGGCTC-------------
Rsa10025571-CR-60 GTGACAGGGCCTTTGAAAGAATGTCCAATGTTCAATTCTTAAGACTTTTGCATTCTGATT
CRa-Chinese GTGACAGAGTTTTTGAAAGAATGCCCAATGTCCAATTCTTAAGAGTC-------------
* ** * * ******** *** **** ** ** ******** *
Rsa10025571-XYB --------------------GAGTCTGGACTG---TCAAGTCAACCATGTCATCACAGCA
Rsa10025571-CR-10 --------------------GAGTCTGGACTG---TCAAGTCAACCATGTCATCACAGCA
Rsa10025571-CR-60 CGGATTCTGATTCTAGTTCTGATTCTAGACGT---CCCAAACAAACATGTCACCACAGCA
CRa-Chinese --------------------AAATATAGAAGTATTCAGAGAAAGCCATATCCTCACAGCA
* * * ** * * *** ** *******
Rsa10025571-XYB TAGATATGATGATACGTCTGCCTTCAAATCTTAGAGTCTTGCATTGGGATTCTTTTCCGA
Rsa10025571-CR-10 TAGATATGATGATACGTCTGCCTTCAAATCTTAGAGTCTTGCATTGGGATTCTTTTCCGA
Rsa10025571-CR-60 CAGATCTAATGACATGTCTGCCTCCAAATCTTAGACTTTTGCATTGGGATTTTTTTCCGA
CRa-Chinese TAGATCCCGTGACATGTCTGCCCCCAAATCTAATTATCCTGCATTGGGATTATTTTCCGA
**** *** * ******* ******* * * ************ ********
Rsa10025571-XYB TGACATGTATGCCTTCTAATTTTAATCCAGAGTTCCTGGTGGAAATAGTTTTGCGTCATA
Rsa10025571-CR-10 TGACATGTATGCCTTCTAATTTTAATCCAGAGTTCCTGGTGGAAATAGTTTTGCGTCATA
Rsa10025571-CR-60 TGACATGTCTGCCTTCTAATTTTAATCCGGAGTTCCTGGTGGAAATAGTCTTGCGTAAAA
CRa-Chinese TGACATGTCTCCCTTCTAATTTTAATCCGGAGTTCCTGACGAGAATAATCTTGACTGAAA
******** * ***************** ********* * **** * *** * * *
Rsa10025571-XYB GCAGCTTCCTTGAGAAATTGTGGGAAGGAAATAAAGTAAGTAAAAATAT--CTATATTTA
Rsa10025571-CR-10 GCAGCTTCCTTGAGAAATTGTGGGAAGGAAATAAAGTAAGTAAAAATAT--CTATATTTA
Rsa10025571-CR-60 GCAACTATCTTGAGAAATTGTGGGAAGGAAATAAAGTAAGTAAACATATTTCTATATCTA
CRa-Chinese ACAACTACCTTGAGAAATTGTGGGAAGGAAATAAAGTAAGTAAAA---------------
** ** ************************************
Rsa10025571-XYB AGACTTTGTATTACTTCAGTTCTATTCAAATCTATAATTTGGCTTCTTGTACATAAAGTT
Rsa10025571-CR-10 AGACTTTGTATTACTTCAGTTCTATTCAAATCTATAATTTGGCTTCTTGTACATAAAGTT
Rsa10025571-CR-60 AGACTTTGTGTTACTTCAGTATTATTCAAATCTATAACTTGTCCGCTTGTACTTTA-GTT
CRa-Chinese ----TTTGTACT-------TTTTATTCGAAATTATAATTTGTCTTTCTGTGCATATACGT
***** * * ***** ** ***** *** * *** * * *
Rsa10025571-XYB AAGGTGAAAAAAGCGATCTTAAGTCTTAGCTGACCAACTTCTTTT-TAAATATAATTTTT
Rsa10025571-CR-10 AAGGTGAAAAAAGCGATCTTAAGTCTTAGCTGACCAACTTCTTTT-TAAATATAATTTTT
Rsa10025571-CR-60 GAGAAGAAAAGAA-GATCTTA--------TTGGACGTCTTCTTTT-T---TATTGATATT
CRa-Chinese TAGCTGAAAAAGGTTATCTTG--TCTTAACGGACCGTCTTCTTTTATTGATATTTTTCCC
** ***** ***** * * ******** * *** *
Rsa10025571-XYB ---TTTTCCTTCTGTACAGACGATTATAAATCTCAAATGGATGGATTTGAGTGATTCCAG	Exon 4
Rsa10025571-CR-10 ---TTTTCCTTCTGTACAGACGATTATAAATCTCAAATGGATGGATTTGAGTGATTCCAG
Rsa10025571-CR-60 ---TTTCTTTTCTGTACAGGCAATTAGAAATCTCAAATGGATGTATTTGTCGGATTCCAA
CRa-Chinese CCCTTTTTTTCCTGTACAGACGATTAGAAATCTGAAATTGATGAATTTGTCGAACTCCAA
*** * ******** * **** ****** **** **** ***** * ****
Rsa10025571-XYB AACTCTAAAGGAGCTTCCTGATCTCTCAACTGCTACAAATCTCCAAGAATTGAATCTTTA
Rsa10025571-CR-10 AACTCTAAAGGAGCTTCCTGATCTCTCAACTGCTACAAATCTCCAAGAATTGAATCTTTA
Rsa10025571-CR-60 AAATCTAAAGGAGCTTCCTGATCTCTCAACGGCCACTAGTCTCCAAGAATTGAATCTTCA
CRa-Chinese AAATCTAAAGGAGCTTCCCGATCTCTCAACTGCCACTAATCTGCAAACATTGGAGCTTTC
** *************** *********** ** ** * *** *** **** * ***
Rsa10025571-XYB TGGTTGCTCAAGTCTAGCGGAGCTCCCCTTTTCTATTGAAAATGCTATCAATCTTCGAAC
Rsa10025571-CR-10 TGGTTGCTCAAGTCTAGCGGAGCTCCCCTTTTCTATTGAAAATGCTATCAATCTTCGAAC
Rsa10025571-CR-60 TGGTTGCTCAAATCTAGCAGAGCTCCCCTTTTCTATTGGAAATGTTCTCAGTCTCCGAAG
CRa-Chinese TGGTTGCTCAAGTCTTACGGAACTCCCCTTTTCTATTGGAAATGCTATCAATCTCCGGCG
*********** *** * ** **************** ***** * *** *** **
Rsa10025571-XYB ATTGCGTCTTAATTATTGCTCAAGTTTAGTGGGGATCCCTTCTTCTGTCTGGAATCTCGT
Rsa10025571-CR-10 ATTGCGTCTTAATTATTGCTCAAGTTTAGTGGGGATCCCTTCTTCTGTCTGGAATCTCGT
Rsa10025571-CR-60 ATTAAATCTTAGTCATTGTTCAAGTCTAGTGAGGATCCCCTCTTTTATTTGGAATCTTGT
CRa-Chinese TTTGAATCTTAGTCATTGCTCAAGTCTGATGGAACTCCCCTCTTCTATGGAAAATGCCAC
** ***** * **** ****** * ** **** **** * * ***
Rsa10025571-XYB TAATCTCCAAAGTTTGTATCTCGGATATTGCTCTAGTCTAGTGAGACTTCCATCTTCATC
Rsa10025571-CR-10 TAATCTCCAAAGTTTGTATCTCGGATATTGCTCTAGTCTAGTGAGACTTCCATCTTCATC
Rsa10025571-CR-60 TGATGTTGGAAGATTGGATTTTAGTCATTGCTCAAGTCTAGTGAGACTTCCATCTTCTTC
CRa-Chinese TGATCTCGAGGAACTGAATCTCACGGGATGCTTACATCTAGCTAAGCTCCCATCCTCTAT
* ** * ** ** * **** ***** * ** ***** **
Rsa10025571-XYB TGGGAATGCTATAATTAAACTCAAAGTATTGGATCTTCATGGATGTACAAGTCTCATGGA
Rsa10025571-CR-10 TGGGAATGCTATAATTAAACTCAAAGTATTGGATCTTCATGGATGTACAAGTCTCATGGA
Rsa10025571-CR-60 TGGGAATGCTATAATTAAACTCAAAGTATTGGATCTTAGTGGATGCACAAGTCTGATGGA
CRa-Chinese TGGTAAT------------CTCAAGAAATTGTATCTCAAAGATTGCTCAAGTTTGGTGGA
*** *** ***** **** **** * ** ***** * ****
Rsa10025571-XYB ACTCCCCTCTTCTATGGAACATGCCACTGATCTCGAGGAACTGAATCTCAACGGATGCTT
Rsa10025571-CR-10 ACTCCCCTCTTCTATGGAACATGCCACTGATCTCGAGGAACTGAATCTCAACGGATGCTT
Rsa10025571-CR-60 ACTCCCCTCTTCTATGGAAAATGCCACTGATCTCGAGGAACTGAATCTCACGGGATGCTT
CRa-Chinese GTTCCCCTCTTCTATGGAAAATGTCACTACTCTCGAGGAATTGCTTCTCACTGGATGCTC
***************** *** **** ********** ** ***** *******
Rsa10025571-XYB ACATCTTGCTAAGCTCCCATCATCTCTTGGTAATCTCAAGAGATTGTATCTCGAAGATTG
Rsa10025571-CR-10 ACATCTTGCTAAGCTCCCATCATCTCTTGGTAATCTCAAGAGATTGTATCTCGAAGATTG
Rsa10025571-CR-60 ACATCTAGCTAAGCTCCCATCCTCTATTGGTAATCTCAAGAGATTGTATCTCAAAGATTG
CRa-Chinese ACATCTAGCTAATCTCCCACCTTCTATTGGTAATCTCAAGACGTTGTATCTCGAGAATTG
****** ***** ****** * *** *************** ********* * ****
Rsa10025571-XYB CTCAAGTTTAGTGGAGCTTCCATCTTCTGTTATAAATTCATTTAATCTCAAGGGTTTTAC
Rsa10025571-CR-10 CTCAAGTTTAGTGGAGCTTCCATCTTCTGTTATAAATTCATTTAATCTCAAGGGTTTTAC
Rsa10025571-CR-60 CTCAAGTTTGGTGGAGCTTCCATCTTCTATTAGAAATTCCATTAATCTCGAGGATTTTAC
CRa-Chinese CTCAAGTTTGGTGGAGCTTCCATCTTCTGTTAGAAATTCCATTAATCTCAAGAATTTTTC
********* ****************** *** ****** ******** ** **** *
Rsa10025571-XYB TTTTAGTGGATGCTCAAATCTTGTGGAGCTCCCTTTCTATCTTGGTAATGCTACTTATGT
Rsa10025571-CR-10 TTTTAGTGGATGCTCAAATCTTGTGGAGCTCCCTTTCTATCTTGGTAATGCTACTTATGT
Rsa10025571-CR-60 TTTTAATGGTTGCTCAAATCTTGTGGAGCTCCCTTTCTATCTTGGTAATGCTACTGATCT
CRa-Chinese TTTTAATGGTTGCTCAAATCTTGTGGAGCTCCCTTTCTATCTTGGTAATGCCACTGATCT
***** *** ***************************************** *** ** *
Rsa10025571-XYB CAACGAAATTGATTTGAGTGGATGCTCAAGTCTACGGGAGCTCCCCTCTTCTATTGGAAA
Rsa10025571-CR-10 CAACGAAATTGATTTGAGTGGATGCTCAAGTCTACGGGAGCTCCCCTCTTCTATTGGAAA
Rsa10025571-CR-60 CAAAAAAAATGATTTGAGTGGATGCTCAAGTCTACGGGAGCTCCCCTTTTCTATTGGAAA
CRa-Chinese CCAGAGATTGTATTTGAGAGGATGTTCAAGTCTACAGGAGCTTCCTTCTTCTATTGGGAA
* * * ******* ***** ********** ****** ** * ********* **
Rsa10025571-XYB TATTACTGATCTCTATATGT-TGCATCTCAGTGAATGCTCACATCTACTGGAGCTCCCCT
Rsa10025571-CR-10 TATTACTGATCTCTATATGT-TGCATCTCAGTGAATGCTCACATCTACTGGAGCTCCCCT
Rsa10025571-CR-60 TATGACTAATCTC-ATGCATCTGTATCTCGATGAATGCTCAAGTCTACGGGAGCTCCCCT
CRa-Chinese TATAACTCGTCTTGAGGAGT-TGATTCTCGAAGAATGCTCAAGTCTTGTTGAGCTCCCTT
*** *** *** * * ** **** ********* *** ******** *
Rsa10025571-XYB CTTCTATTGGAAATATGACTAATCTCAAGAAGTTGCGTCTCAATGGATGCTCAAGTCTTG
Rsa10025571-CR-10 CTTCTATTGGAAATATGACTAATCTCAAGAAGTTGCGTCTCAATGGATGCTCAAGTCTTG
Rsa10025571-CR-60 CTTCTATTGGAAAGATGACTAGTCTCATGTATTTGTATCTCAATGAATGCTCAAGTCTCG
CRa-Chinese CTTCTATCGGAAATATAACTAGTCTCGAGTACTTGAATCTTGATGCGTGTTCAAGTCTTG
******* ***** ** **** **** * * *** *** *** ** ******** *
Rsa10025571-XYB TGAAACTCCACTCTTCTATTGGAAATATGACTAATCTCAAGAAGTTGTGTCTCAATGGAT
Rsa10025571-CR-10 TGAAACTCCACTCTTCTATTGGAAATATGACTAATCTCAAGAAGTTGTGTCTCAATGGAT
Rsa10025571-CR-60 TGGAACTCCCGTCTTCTATTGGAAGTATAAATAATCTCATGAAGTTACATCTTAATGGAT
CRa-Chinese TGAAGCTCCCCTCTTCTATTGGAGATATAATCAATCTGAAGAACTTGTATCTTAATGGAT
** * **** ************ *** * ***** * *** ** *** *******
Rsa10025571-XYB GCTCAAGTCTTGTGGAACTCCCATCTTCTATTGGGGATATGGATAATCTCAGGAAGTTGT
Rsa10025571-CR-10 GCTCAAGTCTTGTGGAACTCCCATCTTCTATTGGGGATATGGATAATCTCAGGAAGTTGT
Rsa10025571-CR-60 GCTCAAGTCTACTGGAACTCCCATCTTCTATTGGAAATATGAACAATCTCGGGAACTTAT
CRa-Chinese GCTCAAGTCTTGTGGAACTCCCATCTTCTATTGGAAATATAAATTATCTCAAGAAGTTGT
********** ********************** **** * ***** *** ** *
Rsa10025571-XYB CTCTCAATGGATGCTCAAAGCTAAAGGGCCTTCCCATCAACATC---AACATCAA-----
Rsa10025571-CR-10 CTCTCAATGGATGCTCAAAGCTAAAGGGCCTTCCCATCAACATC---AACATCAA-----
Rsa10025571-CR-60 ACCTTAATGGTTGCTCAAGTCTTGTGGAACTTCCATCTTCTATTGGAAATATAAATCATC
CRa-Chinese CTCTTAATGGATGCTCAAGTCTGGTAGAGCTCCCCTCTTCCATTGGGAATATGACTAGTC
** ***** ******* ** * ** ** ** ** ** *
Rsa10025571-XYB -CATGAAAT---CTCTTGAT--ATACTTGA-TCTCACTAA----CTGCTTGTCATTGAAA
Rsa10025571-CR-10 -CATGAAAT---CTCTTGAT--ATACTTGA-TCTCACTAA----CTGCTTGTCATTGAAA
Rsa10025571-CR-60 TCAGGAAGTTGTCTCTTAATGGATGCTCAAGTCTTGTGGAACTTCCATCTTCTATTGGAA
CRa-Chinese TTGAAGAGTTGAATCTTAATGGATGCTCAAGTCTTGTGGAACTTCCATCTTCTATTGGAA
* * **** ** ** ** * *** * * * **** **
Rsa10025571-XYB AGCT-------TTCCAGAG-----ATTTCCACAAACA-TCAGAGTTCTAAAGCTCACTGG
Rsa10025571-CR-10 AGCT-------TTCCAGAG-----ATTTCCACAAACA-TCAGAGTTCTAAAGCTCACTGG
Rsa10025571-CR-60 AAATGAATCAGCTCAGGAAGCTGTATCTCGAAAGATGCTCAAAGCTAAGGGCCTTTCCGG
CRa-Chinese ATATGAATAATCTCTGGATGTTGTATCTCGAAAGATGCTCCAACCTAACGGCCCTTCCGA
* * ** ** ** ** * * * ** * * * * *
Rsa10025571-XYB --AACTTCAATAGAAGA----------AATTCCTCC--ATCAATCATG--TCATGGCCTC
Rsa10025571-CR-10 --AACTTCAATAGAAGA----------AATTCCTCC--ATCAATCATG--TCATGGCCTC
Rsa10025571-CR-60 TCAATATCAACATGAAATCTCTTGGTAAACTTATTCTCACTGACTGCTCTTCATTGAATT
CRa-Chinese TCAATATCAACATGAAATCTCTTCGTGTACTTGCTCTCACAGACTGCTCGTCATTGAAAA
** **** * * * * * * * * **** *
Rsa10025571-XYB GCCTCCGTGAGTT----ACATATGTCATACTTTGAAAACCTCAAGAAATCCCGGCA----
Rsa10025571-CR-10 GCCTCCGTGAGTT----ACATATGTCATACTTTGAAAACCTCAAGAAATCCCGGCA----
Rsa10025571-CR-60 GCGTTCCGGAGATTTCCACAAACATCAGAGTTCTAAAGCTCACTGGAACTGCAATAGAAG
CRa-Chinese GCTTTCCGGAGATTTCCACAAACATCAGAGTTCTAAAGCTCACTGGAACTGCAATAGAAG
** * * *** * *** * *** * ** *** * * ** * *
Rsa10025571-XYB ---TGCTT---TTGACCGCATCACGG-------------ATCTGCACTTGTGCGATACAA
Rsa10025571-CR-10 ---TGCTT---TTGACCGCATCACGG-------------ATCTGCACTTGTGCGATACAA
Rsa10025571-CR-60 AATTACCTCCATCAATCATGTCATGGCCTCGTCTTCGTGAGTTACACTTGAGCGACACAA
CRa-Chinese AAATCCCTCCATCAATCATGTCATGGCCATGGCTTTCTGAGTTAAATATGTCATACTTGG
* * * * * * *** ** * * * ** *
Rsa10025571-XYB GAA--TACAAGAAATTGCTCCGTGGGTCAGG---GA--AATGTCTTG--TCTACGTGAAC
Rsa10025571-CR-10 GAA--TACAAGAAATTGCTCCGTGGGTCAGG---GA--AATGTCTTG--TCTACGTGAAC
Rsa10025571-CR-60 GAA--TACAAGAAATTGCTCCATGGGTCAAGAAGGA--AAAGTGTAG--TCTACGTGAAC
CRa-Chinese AGAACCTCAAGAAATCTCAGCATGCTTTATACCGCATCACGGACCTGCTTTTGAGTGATA
* ******** * * ** * * * * * * * * ****
Rsa10025571-XYB TTGTAAT-CAAGGGATG-----------CACGAAGCTGGTTTCTCTTCCGC---AGCTTC
Rsa10025571-CR-10 TTGTAAT-CAAGGGATG-----------CACGAAGCTGGTTTCTCTTCCGC---AGCTTC
Rsa10025571-CR-60 TTGTAAT-CAAGGGATG-----------CACGAAGCTGGTTTCTCTTCCGC---AGCTCC
CRa-Chinese CAGGAATACAAGAAACTGCTCCATGGGTCAAGAAGGAAAGGTCTCGTATACGTGAACTTG
* *** **** * ** **** **** * * * **
Rsa10025571-XYB CT-------GACTCCTTAA--AATTCCTAATTGCAGACAACTGTGAGTCCCTCGAGACAG
Rsa10025571-CR-10 CT-------GACTCCTTAA--AATTCCTAATTGCAGACAACTGTGAGTCCCTCGAGACAG
Rsa10025571-CR-60 CG-------GACTCCTTAA--AACTCCTAGTCGCAGACAATTGTCGGTCCCTCGAGAGAC
CRa-Chinese TAATCAAGCGATGCACTGAGCAAGTTTCTTTTCCACAGGATTGTAAGTTCTGCAAGAGAC
** * * * ** * * ** * * *** ** * * *** *
Rsa10025571-XYB TCCATCGCTCTTTTTACAAGACAAAGTGTAATGCGCTCAGCTTTATCAACTGTTTTAAAC
Rsa10025571-CR-10 TCCATCGCTCTTTTTACAAGACAAAGTGTAATGCGCTCAGCTTTATCAACTGTTTTAAAC
Rsa10025571-CR-60 TAGATTGCTCTTTTCACAAGAAAAAGTTTAATGCGCTCAGCTTTGTTAACTGCTTTAAAC
CRa-Chinese ATCATTTCTCTCTTTACAAGCACAAGTCTAATGTGTTCATCGTTATCAACTGCCTTAAAC
** **** ** ***** **** ***** * *** * ** * ***** ******
Rsa10025571-XYB TGAATCAAGAAGCAAGAGACCTTATCATCAACGCATCGACAAGAGACTTTGCAATTTTTC
Rsa10025571-CR-10 TGAATCAAGAAGCAAGAGACCTTATCATCAACGCATCGACAAGAGACTTTGCAATTTTTC
Rsa10025571-CR-60 TGAATCAAGAAGCAAGAGACATTATCATCAAGACATCAACAAGAGACTTTGCAGTGTTTC
CRa-Chinese TGAATCAAGAAACAAGAGACCTTATCATCAAGACATCGACAAGAGACTTTACAATTCTGC
*********** ******** ********** **** ************ ** * * *
Rsa10025571-XYB CCGGAGAAACAGTGCCCCCATATTTCACTTACCGAGCTACCGGGAGTTCCGTGTCAGTGA
Rsa10025571-CR-10 CCGGAGAAACAGTGCCCCCATATTTCACTTACCGAGCTACCGGGAGTTCCGTGTCAGTGA
Rsa10025571-CR-60 CAGGAGAAACAGTGCCAACATATTTCACGTACCGAGCCACCGGGAGTTCCATGTCAATGA
CRa-Chinese CCGGAGAAACAGTGCCCACATATTTCAGTTACCGAGCCGCCGGGAGTTCCCTGTCAATGA
* ************** ********* ******** *********** ***** ***
Rsa10025571-XYB AATGGAA-TGAATTAGTTACACAGTACTTTCCTACATCC-TTGAGATTTAAAGCTTGCCT
Rsa10025571-CR-10 AATGGAAATGAATTAGTTACACAGTACTTTCCTACATCCCTTGAGATTTAAAGCTTGCCT
Rsa10025571-CR-60 CGTGGAG-TGGATTAGATACACAGTACTTTCCAACATCC-TTGAGATTTAATGCTTGCCT
CRa-Chinese CGTGGAA-TGGATTAGATACAGAGTACTTTCCTACATCC-TTGAGATTTAGAGCTTGCCT
**** ** ***** **** ********** ****** ********** ********
Rsa10025571-XYB CTTGTTGGCTTATAAGGGTGACGTAGATGCTGGTGATTGGTGCTGGCCTGAAATATCTTG
Rsa10025571-CR-10 CTTGTTGGCTTATAAGGGTGACGTAGATGCTGGTGATTGGTGCTGGCCTGAAATATCTTG
Rsa10025571-CR-60 CTTGCTGGTTTATAAGGGTGACGTTGATGCTGGGGATTGGTGCTGGCCTGATATATCTTA
CRa-Chinese CTTGCTGGTTTATAAGGGTCACGTTGGTG---GTCATCGGCAGTGGTCTGAAATAACTTA
**** *** ********** **** * ** * ** ** *** **** *** ***
Rsa10025571-XYB TTGCATGAAGGACAAACGGAAAAGTGTTAAATCTGGTTACGCAGCTTTTGCTTATTTATG
Rsa10025571-CR-10 TTGCATGAAGGACAAACGGAAAAGTGTTAAATCTGGTTACGCAGCTTTTGCTTATTTATG
Rsa10025571-CR-60 TTGCATCAAGGACAAACTGGGTGGTGTTAAATCTGGTTACGCAGCTTATGCTGATCTATG
CRa-Chinese TTGCATCAAGGACAAGCTCACTGGTGTTGA--------ACGTTATTCTCATAGATTTGT-
****** ******** * ***** * *** * ** * *
Rsa10025571-XYB GCAACGCTCTTCTCCAACTTCAAAGGAGCATCTGCTCGTATTCAAAATTGAAGAAATCAT
Rsa10025571-CR-10 GCAACGCTCTTCTCCAACTTCAAAGGAGCATCTGCTCGTATTCAAAATTGAAGAAATCAT
Rsa10025571-CR-60 GCACCGCTCTTCTCCAACTTCAAAGGAGCATCTGCTCGTATTCAAAATTGAAGGAAAACT
CRa-Chinese ---CAACTTGCCTCCAACTCCAGACGACCATCTGTTCGTATTCGAAATTGAAGAAACTGT
** ******** ** * ** ****** ******** ********* ** *
Rsa10025571-XYB AAATTCCCACGAACTAGTCTTTGAGTTC---TCCCACAACAAAAATTGGGAGATTTTAGA
Rsa10025571-CR-10 AAATTCCCACGAACTAGTCTTTGAGTTC---TCCCACAACAAAAATTGGGAGATTTTAGA
Rsa10025571-CR-60 GGGCTCACCCGAATTAGCCTTTGAGTTCAGATCCCATGACAAAAACTGGGAGATTGAGGA
CRa-Chinese GAGTGCTCCTGAGTTAGTCTTTGAGTTTGGATTCACCAACAAAAATTGGGAGATTAAAAA
* * ** *** ********* * * ******* ********* *
Rsa10025571-XYB ATGCGGGCTACGTCCTGTGAAAA-----------------------CCTTGGCTCCCTCA
Rsa10025571-CR-10 ATGCGGGCTACGTCCTGTGAAAA-----------------------CCTTGGCTCCCTCA
Rsa10025571-CR-60 ATCCGGGCTACGTCCTCTGGAAAGTTGGAAACATTTGCTTTGGAATCCTTGGCTCCCTCA
CRa-Chinese ATGCGGGCTACATCCTCTGGAAA-----------------------------CTCCCTCA
** ******** **** ** *** ********
Rsa10025571-XYB TGTCAATGGAAGCTGTGA------------------------------------------
Rsa10025571-CR-10 TGTCAATGGAAGCTGTGA------------------------------------------
Rsa10025571-CR-60 TGTCAATGGAAGCTGTGA------------------------------------------
CRa-Chinese TGTTAATGGAAGCTGTGA------------------------------------------
*** **************------------------------------------------
